# Supplementary material
Source: PubMed Central journal article supplement (PMC3328308)

## Supporting Information

**NMR Data (400 MHz, basic frequency, CDCl<sub>3</sub>) for the paper:**

### **Twilight Zone Sponges from Guam Yield Theonellin Isocyanate and Psammaplysins I and J**

**By**

Anthony D. Wright,<sup>¥,\*</sup> Peter J. Schupp,<sup>§,⊥</sup> Jan-Philipp Schrör,<sup>§</sup> Anna Engemann,<sup>§</sup> Sven Rohde,<sup>§</sup> Dovi Kelman,<sup>¥</sup> Nicole de Voogd,<sup>||</sup> Anthony Carroll,<sup>Δ</sup> and Cherie A. Motti<sup>○</sup>

<sup>¥</sup>College of Pharmacy, University of Hawaii at Hilo, Hilo, 96720 Hawaii, USA, <sup>§</sup>Marine Laboratory, University of Guam, Mangilao, Guam 96923, <sup>⊥</sup>Institute for Chemistry and Biology of the Marine Environment (ICBM), PO Box 2503, University of Oldenburg, 26111 Oldenburg, <sup>||</sup>Netherlands Centre for Biodiversity Naturalis, Leiden, The Netherlands, <sup>Δ</sup>Griffith University, School of Environment, Gold Coast Campus, QLD 4222, <sup>○</sup>Australia, Australian Institute of Marine Science, PMB no. 3, Townsville MC, Townsville, QLD 4810, Australia

**Supporting Information: List of Contents:**

|                                                                                                                                                                                                                                   |           |
|-----------------------------------------------------------------------------------------------------------------------------------------------------------------------------------------------------------------------------------|-----------|
| • Pictures of both sponges                                                                                                                                                                                                        | <b>3</b>  |
| • Table S1                                                                                                                                                                                                                        | <b>4</b>  |
| • <sup>1</sup> H-NMR spectrum of <b>1</b>                                                                                                                                                                                         | <b>5</b>  |
| • <sup>13</sup> C-NMR spectrum of <b>1</b>                                                                                                                                                                                        | <b>6</b>  |
| • COSY-NMR spectrum of <b>1</b>                                                                                                                                                                                                   | <b>7</b>  |
| • HMBC-NMR spectrum of <b>1</b>                                                                                                                                                                                                   | <b>8</b>  |
| • Expansion of HMBC-NMR spectrum of <b>1</b> showing CH <sub>3</sub> correlation to the C of the NCO                                                                                                                              | <b>9</b>  |
| • HSQC-NMR spectrum of <b>1</b>                                                                                                                                                                                                   | <b>10</b> |
| • NOESY-NMR spectrum of <b>1</b>                                                                                                                                                                                                  | <b>11</b> |
| • <sup>1</sup> H-NMR spectrum of <b>2</b> with traces of <b>4</b> and some phthalate                                                                                                                                              | <b>12</b> |
| • <sup>13</sup> C-NMR spectrum of <b>2</b> with traces of <b>4</b> and some phthalate                                                                                                                                             | <b>13</b> |
| • <sup>1</sup> H-NMR spectrum of <b>3</b>                                                                                                                                                                                         | <b>14</b> |
| • <sup>13</sup> C-NMR spectrum of <b>3</b>                                                                                                                                                                                        | <b>15</b> |
| • <sup>1</sup> H-NMR spectrum of <b>4</b>                                                                                                                                                                                         | <b>16</b> |
| • Combined HSQC (Red and purple) and HMBC (Blue)-NMR spectra of <b>4</b>                                                                                                                                                          | <b>17</b> |
| • <sup>1</sup> H-NMR spectrum of <b>5</b>                                                                                                                                                                                         | <b>18</b> |
| • COSY-NMR spectrum of <b>5</b>                                                                                                                                                                                                   | <b>19</b> |
| • <sup>13</sup> C-NMR spectrum of <b>5</b>                                                                                                                                                                                        | <b>20</b> |
| • HMBC-NMR spectrum of <b>5</b>                                                                                                                                                                                                   | <b>21</b> |
| • HMBC-NMR spectrum of <b>5</b>                                                                                                                                                                                                   | <b>22</b> |
| • NOESY-NMR spectrum of <b>5</b>                                                                                                                                                                                                  | <b>23</b> |
| • <sup>1</sup> H-NMR spectra of 3:2 mixture of <b>5</b> and <b>6</b> (Black), <sup>1</sup> H-NMR of <b>5</b> (Red), and their difference spectra (Green). Hence the green spectrum is the <sup>1</sup> H-NMR spectrum of <b>6</b> | <b>24</b> |
| • COSY-NMR spectrum of <b>6</b> (3:2 Mixture of <b>5</b> and <b>6</b> )                                                                                                                                                           | <b>25</b> |
| • HMBC-NMR spectrum of <b>6</b> (3:2 Mixture of <b>5</b> and <b>6</b> )                                                                                                                                                           | <b>26</b> |
| • HSQC-NMR spectrum of <b>6</b> (3:2 Mixture of <b>5</b> and <b>6</b> )                                                                                                                                                           | <b>27</b> |
| • <sup>1</sup> H-NMR spectrum of <b>7</b>                                                                                                                                                                                         | <b>28</b> |
| • HMBC-NMR spectrum of <b>7</b>                                                                                                                                                                                                   | <b>29</b> |
| • <sup>1</sup> H-NMR spectrum of <b>8</b>                                                                                                                                                                                         | <b>30</b> |
| • <sup>1</sup> H-NMR spectrum of <b>9</b>                                                                                                                                                                                         | <b>31</b> |
| • HMBC-NMR spectrum of <b>9</b>                                                                                                                                                                                                   | <b>32</b> |

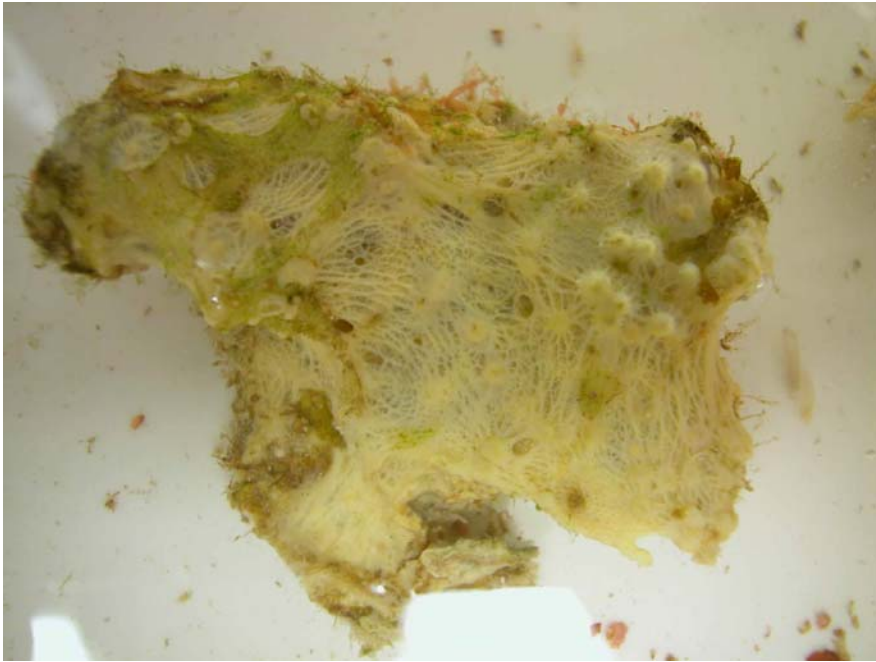

***Suberea* sp.**

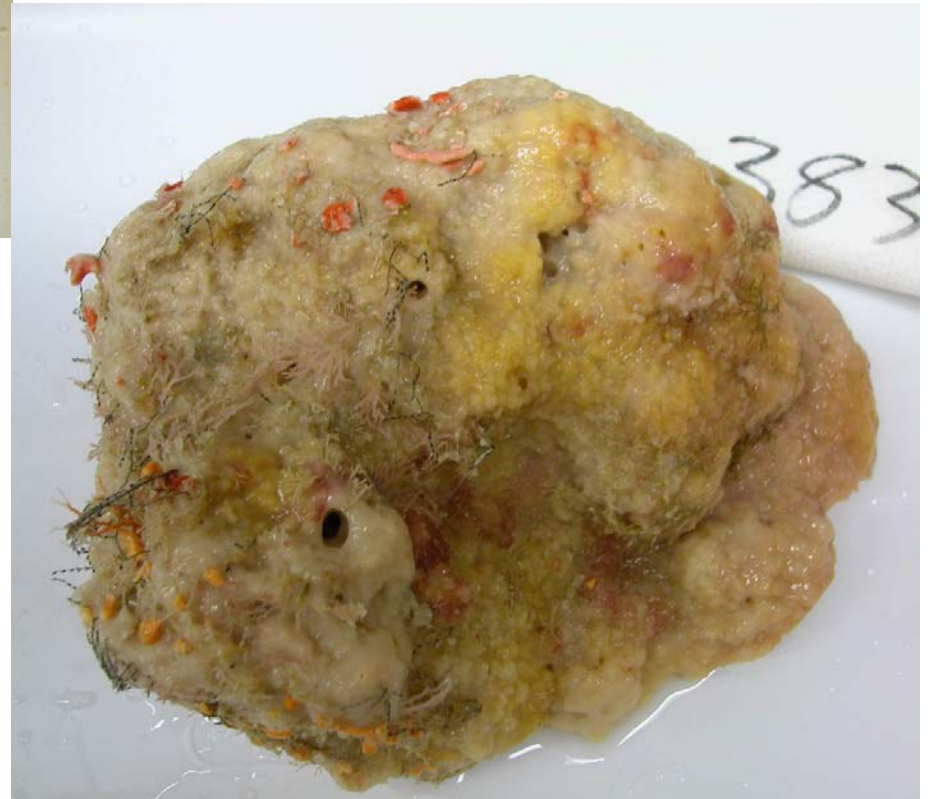

***Rhaphoxya* sp.**

**Table S1.**  $^1\text{H}$  (400 MHz  $\text{CDCl}_3$ ) and  $^{13}\text{C}$  NMR(100 MHz  $\text{CDCl}_3$ ) Spectroscopic Data for **3**, **4** and **10**<sup>a</sup>

| No.             | $\delta_{\text{C}}$ , mult. ( <b>3</b> ) | $\delta_{\text{H}}$ ( <i>J</i> in Hz) ( <b>3</b> ) | $\delta_{\text{C}}$ , mult. ( <b>4</b> ) | $\delta_{\text{H}}$ ( <i>J</i> in Hz) ( <b>4</b> ) | $\delta_{\text{C}}$ , mult. ( <b>10</b> ) | $\delta_{\text{H}}$ ( <i>J</i> in Hz) ( <b>10</b> ) |
|-----------------|------------------------------------------|----------------------------------------------------|------------------------------------------|----------------------------------------------------|-------------------------------------------|-----------------------------------------------------|
| 1               | 26.4, $\text{CH}_2$                      | 1.42, m; 1.71, m                                   | 24.1, $\text{CH}_2$                      | 1.30, m; 1.83, m                                   | 145.4, CH                                 | 7.00, s                                             |
| 2               | 38.2, $\text{CH}_2$                      | 1.81, m; 1.91, m                                   | 31.0, $\text{CH}_2$                      | 2.02, m                                            | 103.5, C                                  |                                                     |
| 3               | 56.7, C, t,<br>4.0 Hz                    |                                                    | 134.2 C                                  |                                                    | 148.5, C                                  |                                                     |
| 4               | 38.2, $\text{CH}_2$                      | 1.81, m; 1.91, m                                   | 120.1, CH                                | 5.38, brm                                          | 104.6, C                                  |                                                     |
| 5               | 26.4, $\text{CH}_2$                      | 1.42, m; 1.71, m                                   | 27.1, $\text{CH}_2$                      | 1.92, m; 2.11, m                                   | 37.1, $\text{CH}_2$                       | 3.09, d, (16.0)<br>3.38, d, (16.0)                  |
| 6               | 44.7, CH                                 | 1.97, m                                            | 43.4, CH                                 | 1.72, m                                            | 121.3, C                                  |                                                     |
| 7               | 138.6, C                                 |                                                    | 67.1, C                                  |                                                    | 78.8, CH                                  | 5.03, s                                             |
| 8               | 123.8, CH                                | 5.79, brd. (10.7)                                  | 39.3, $\text{CH}_2$                      | 1.60, m; 1.70, m                                   | 156.7, C                                  |                                                     |
| 9               | 123.4, CH                                | 6.20, ddd, (1.3, 10.7,<br>15.2)                    | 23.0, $\text{CH}_2$                      | 2.09, m                                            | 158.8, C                                  |                                                     |
| 10              | 140.7, CH                                | 5.59, dd, (6.9, 15.2)                              | 123.2, CH                                | 5.09, brt, (6.7)                                   | 37.0, $\text{CH}_2$                       | 3.68, m                                             |
| 11              | 31.4, CH                                 | 2.34, dqg, (6.9, 6.7, 6.7)                         | 132.8, C                                 |                                                    | 29.3, $\text{CH}_2$                       | 2.08, m                                             |
| 12              | 22.5, $\text{CH}_3$                      | 1.00, d, (6.7)                                     | 26.1, $\text{CH}_3$                      | 1.70, brs                                          | 70.8, $\text{CH}_2$                       | 4.05, t, (5.5)                                      |
| 13              | 25.1, $\text{CH}_3$                      | 1.43, brs                                          | 23.5, $\text{CH}_3$                      | 1.65, brs                                          | 151.0, C                                  |                                                     |
| 14              | 15.2, $\text{CH}_3$                      | 1.71, brs                                          | 23.7, $\text{CH}_3$                      | 1.35, s                                            | 118.0, C                                  |                                                     |
| 15              | 22.5, $\text{CH}_3$                      | 1.01, d, (6.7)                                     | 18.0, $\text{CH}_3$                      | 1.63, brs                                          | 132.8, CH                                 |                                                     |
| 16              | 152.1, NC                                |                                                    | 129.7, NCS                               |                                                    | 138.6, C                                  |                                                     |
| 17              |                                          |                                                    |                                          |                                                    | 132.8, CH                                 | 7.34, s                                             |
| 18              |                                          |                                                    |                                          |                                                    | 118.0, C                                  |                                                     |
| 19              |                                          |                                                    |                                          |                                                    | 34.3, $\text{CH}_2$                       | 2.73, t, (7.0)                                      |
| 20              |                                          |                                                    |                                          |                                                    | 52.1, $\text{CH}_2$                       | 2.82, t, (7.0)                                      |
| 21              |                                          |                                                    |                                          |                                                    | 59.0, $\text{CH}_3$                       | 3.67, s                                             |
| N $\text{CH}_3$ |                                          |                                                    |                                          |                                                    | 57.0, $\text{CH}_3$                       | 2.44, s                                             |
| CONH            |                                          |                                                    |                                          |                                                    |                                           | 7.26, s                                             |
| NH              |                                          |                                                    |                                          |                                                    |                                           | 3.68, s                                             |
| OH              |                                          |                                                    |                                          |                                                    |                                           | 4.10, s                                             |

<sup>a</sup>All assignments are based on interpretation of extensive 1D and 2D NMR measurements

$^1\text{H-NMR}$  spectrum of **1**

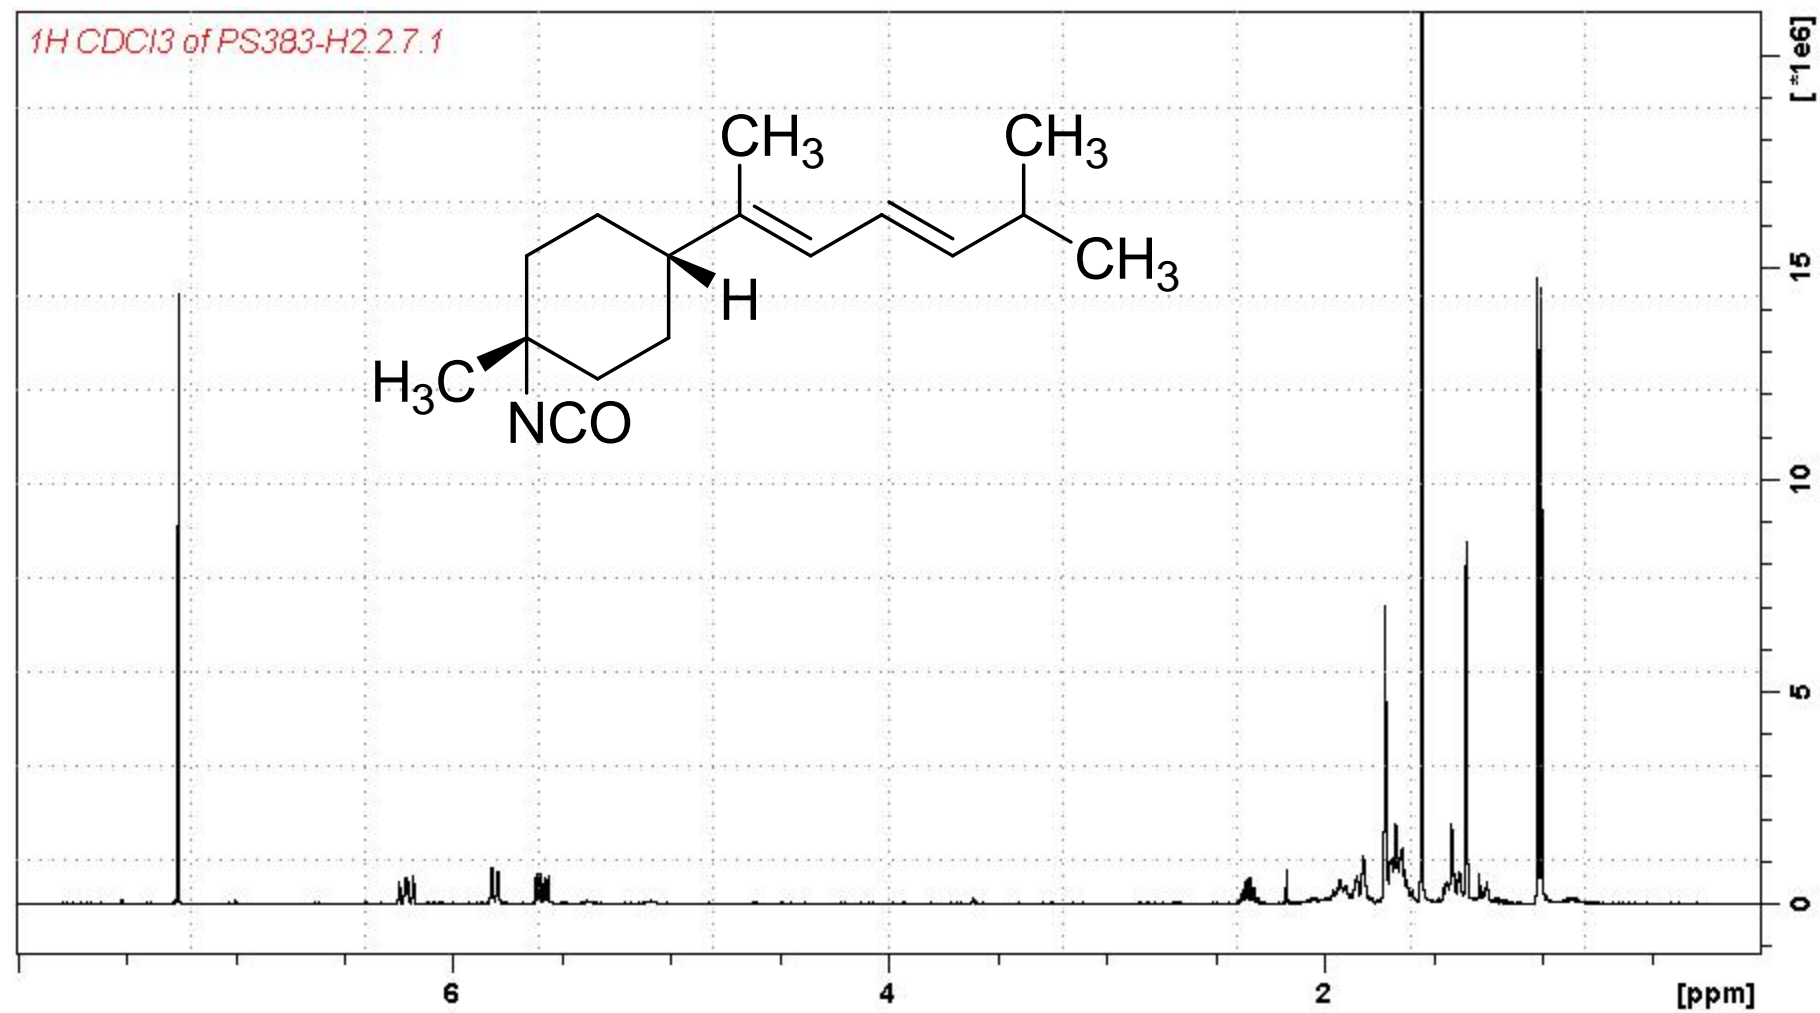

$^{13}\text{C}$ -NMR spectrum of **1**

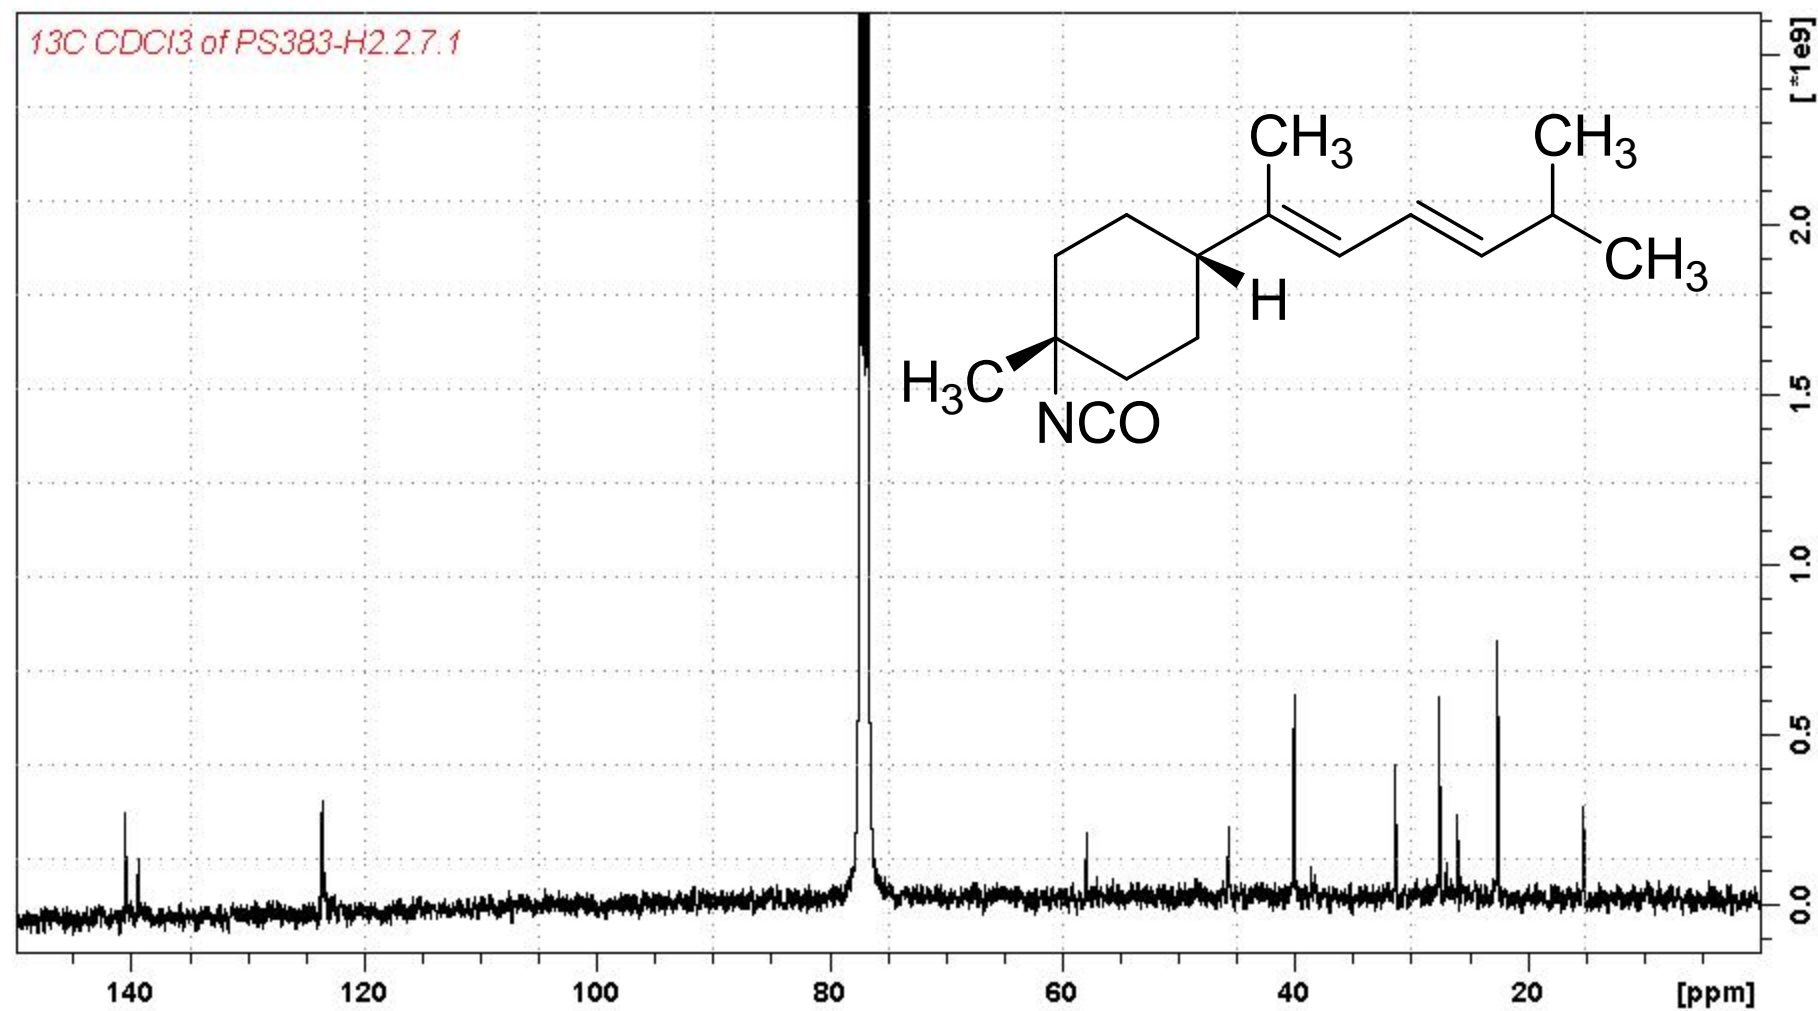

COSY-NMR spectrum of **1**

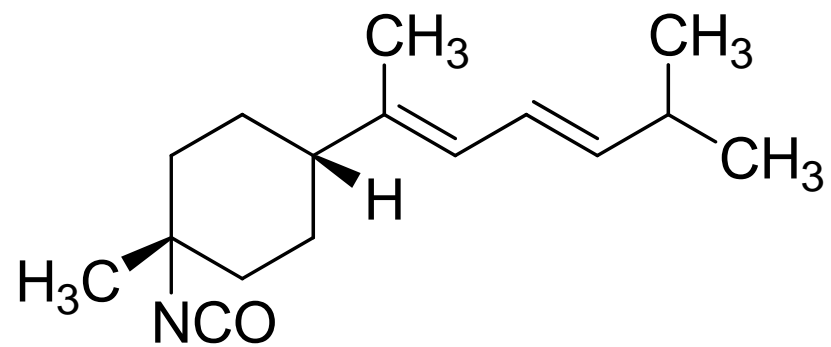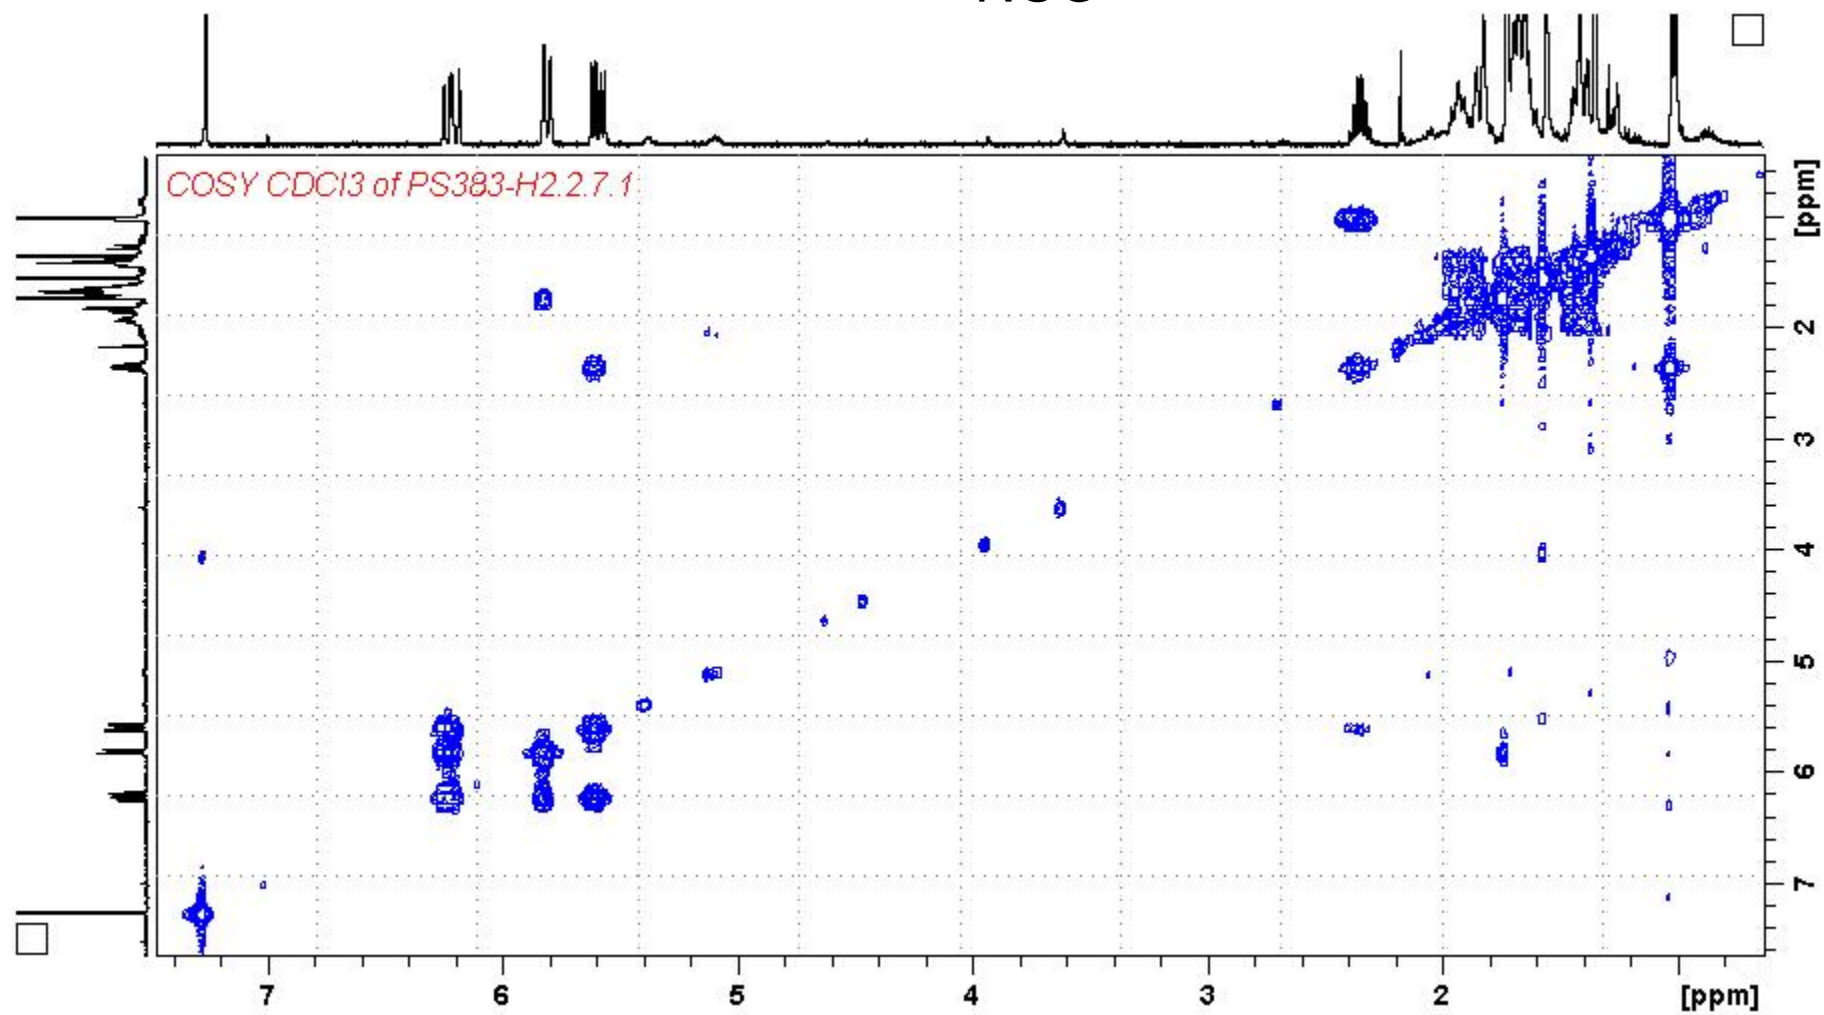

# HMBC-NMR spectrum of **1**

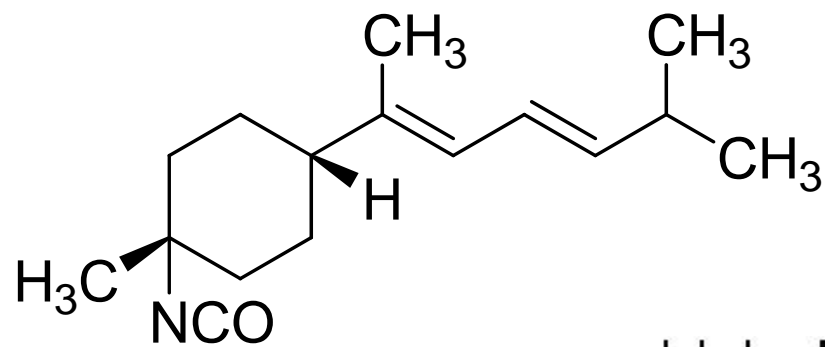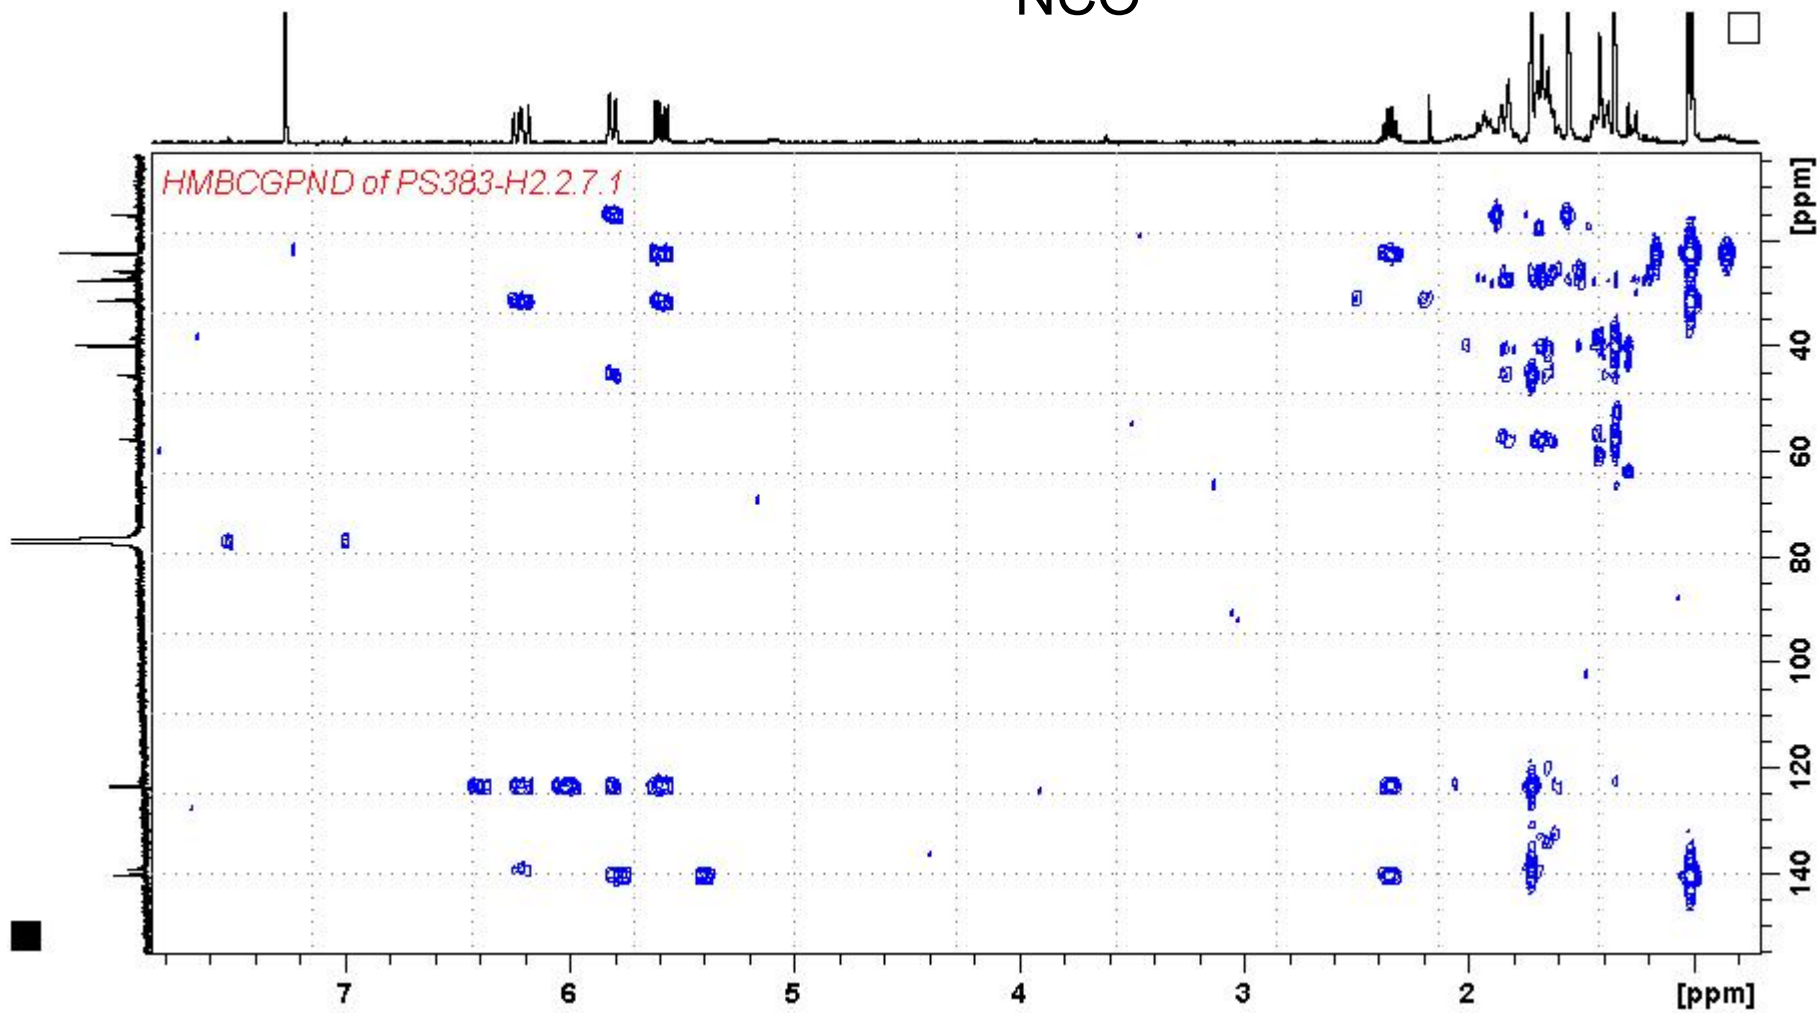



Expansion of HMBC-NMR spectrum of **1**  
showing CH<sub>3</sub> correlation to the C of the NCO

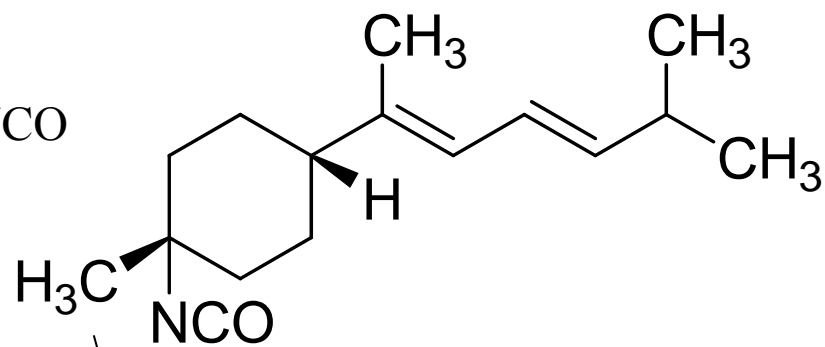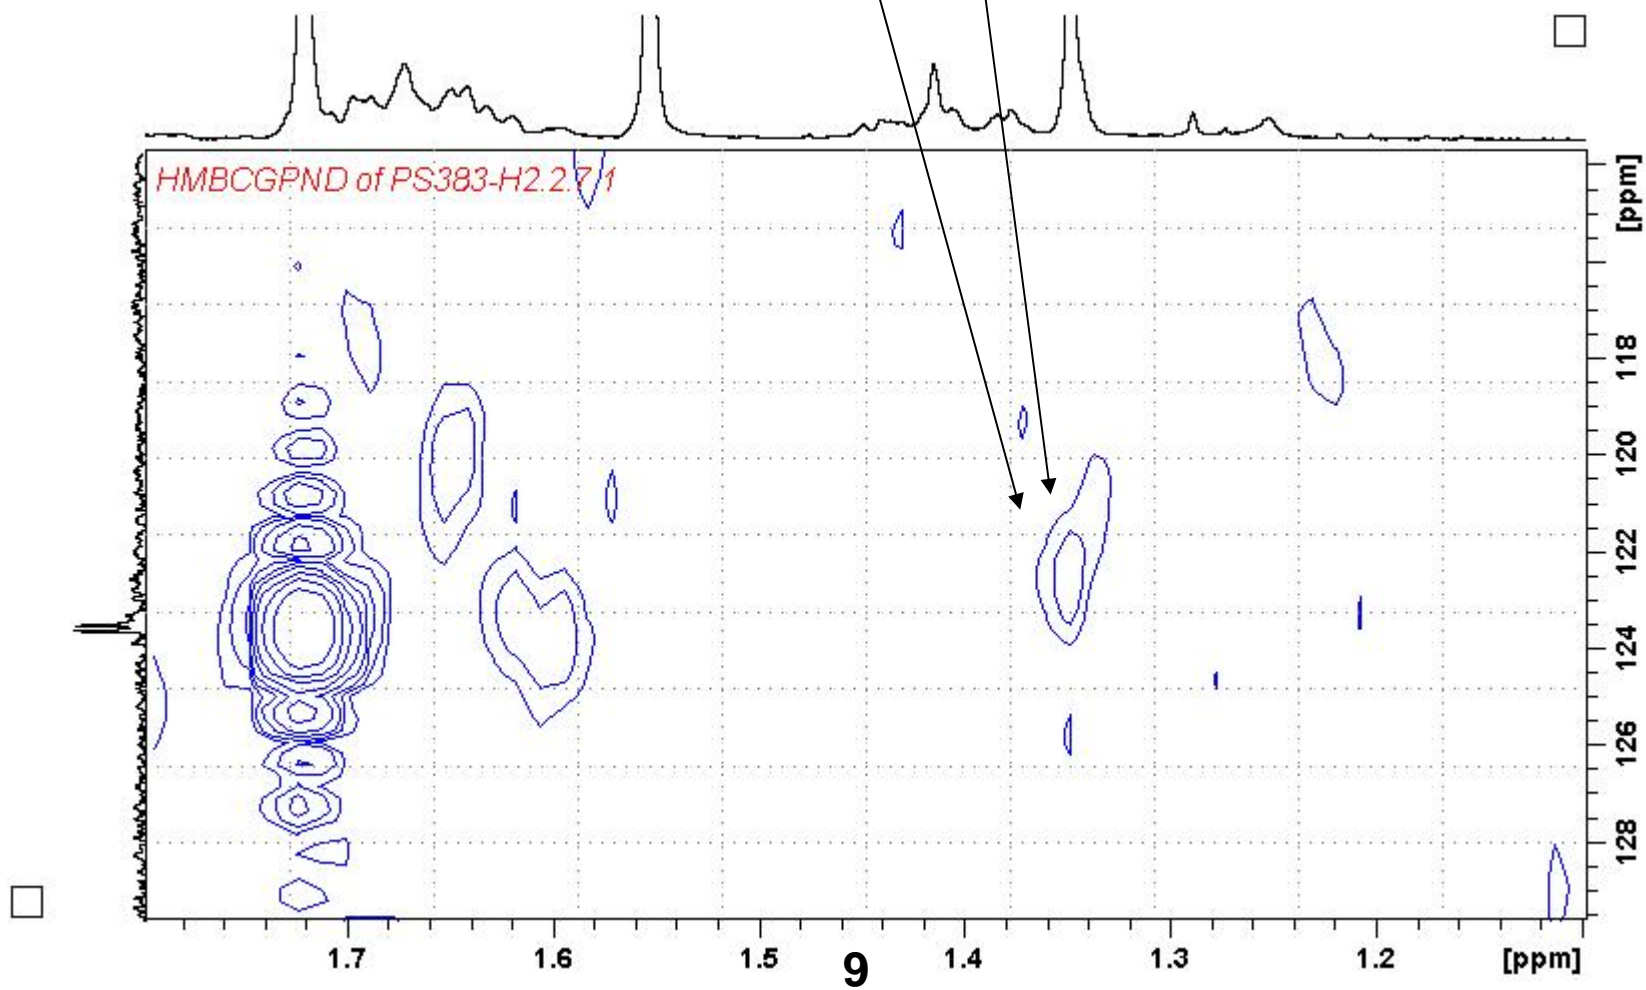

HSQC-NMR spectrum of **1**

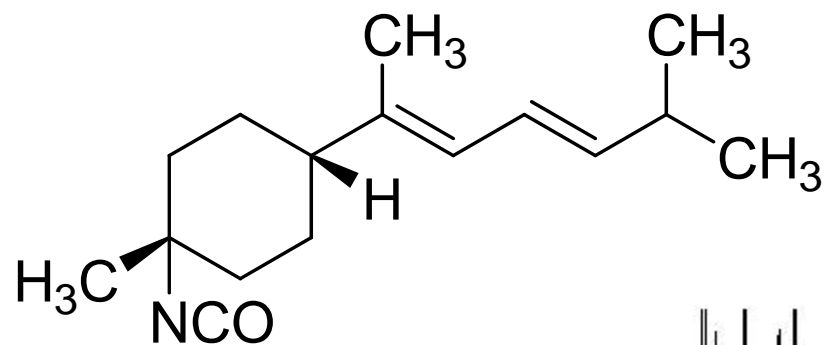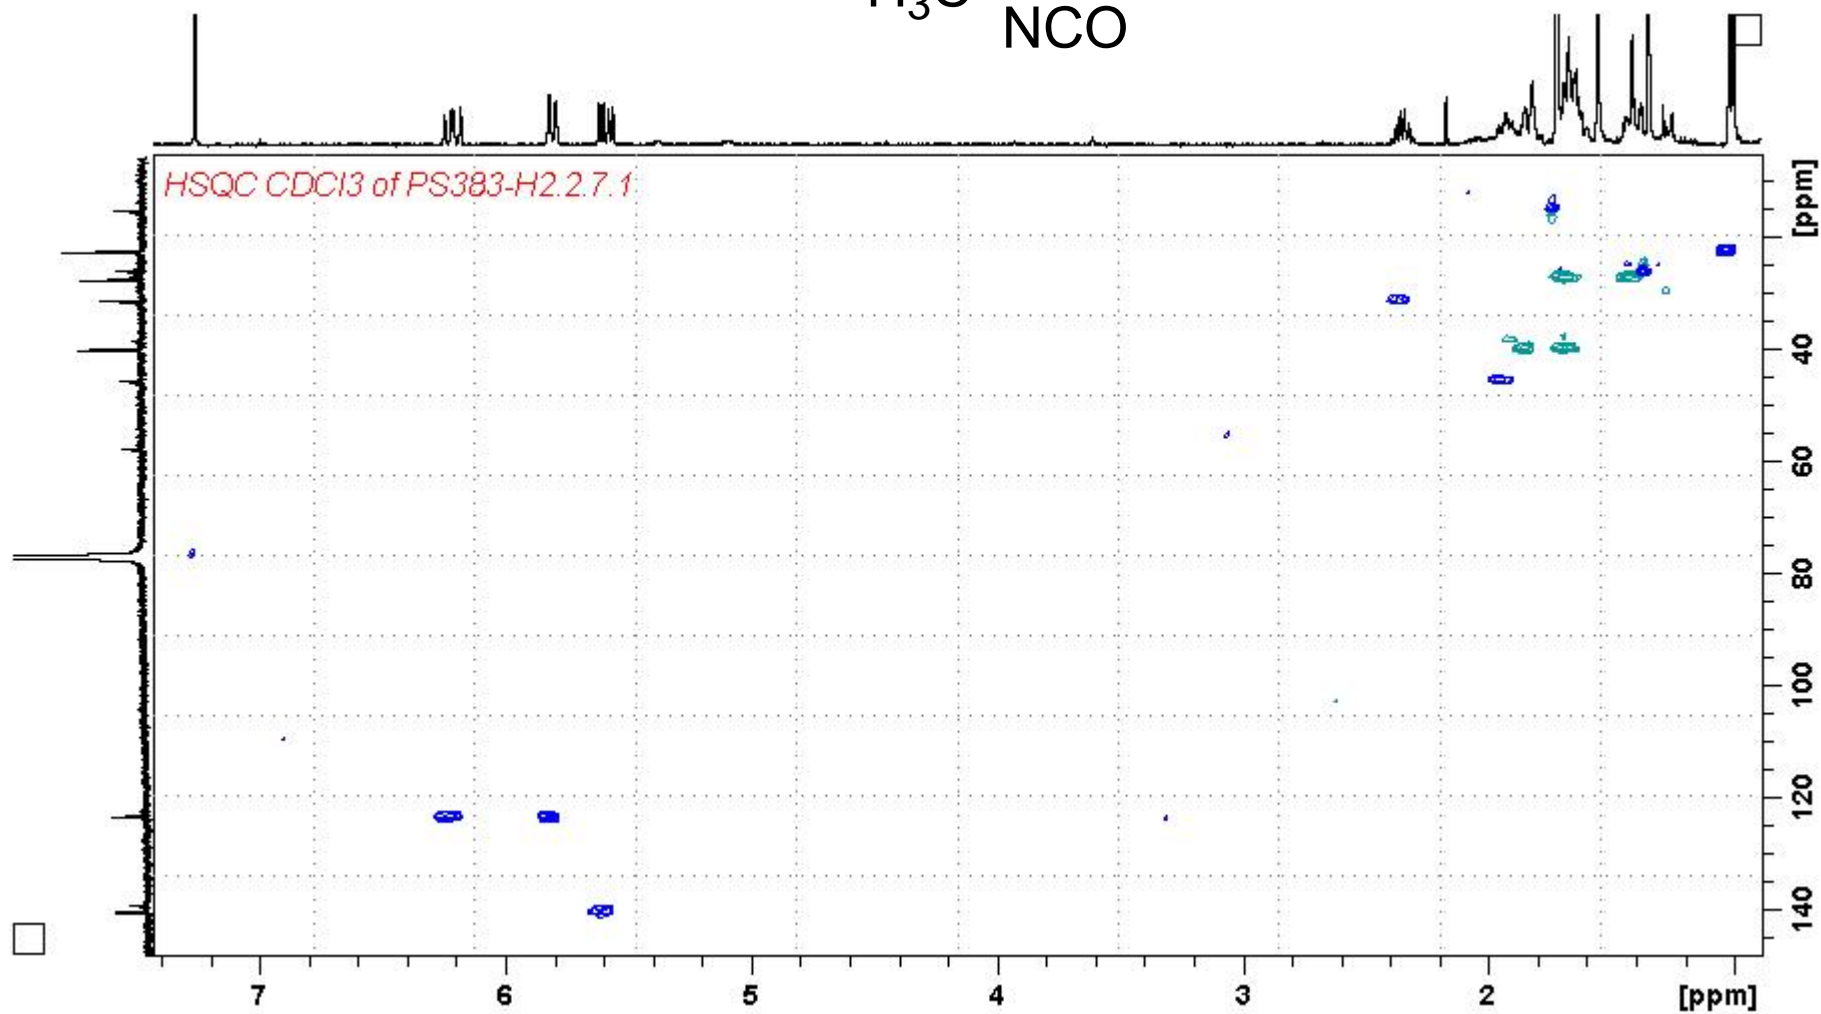

NOESY-NMR spectrum of **1**

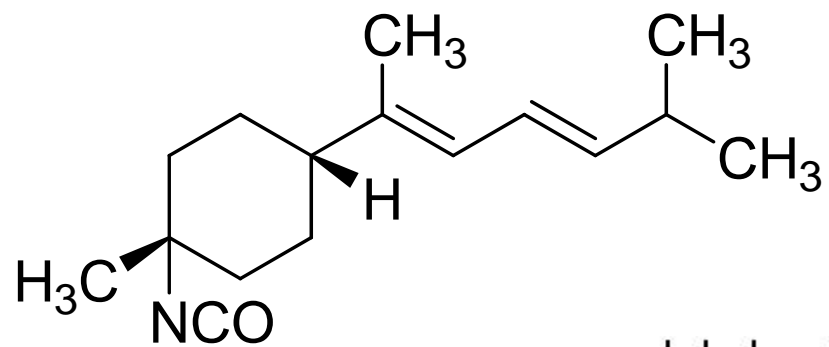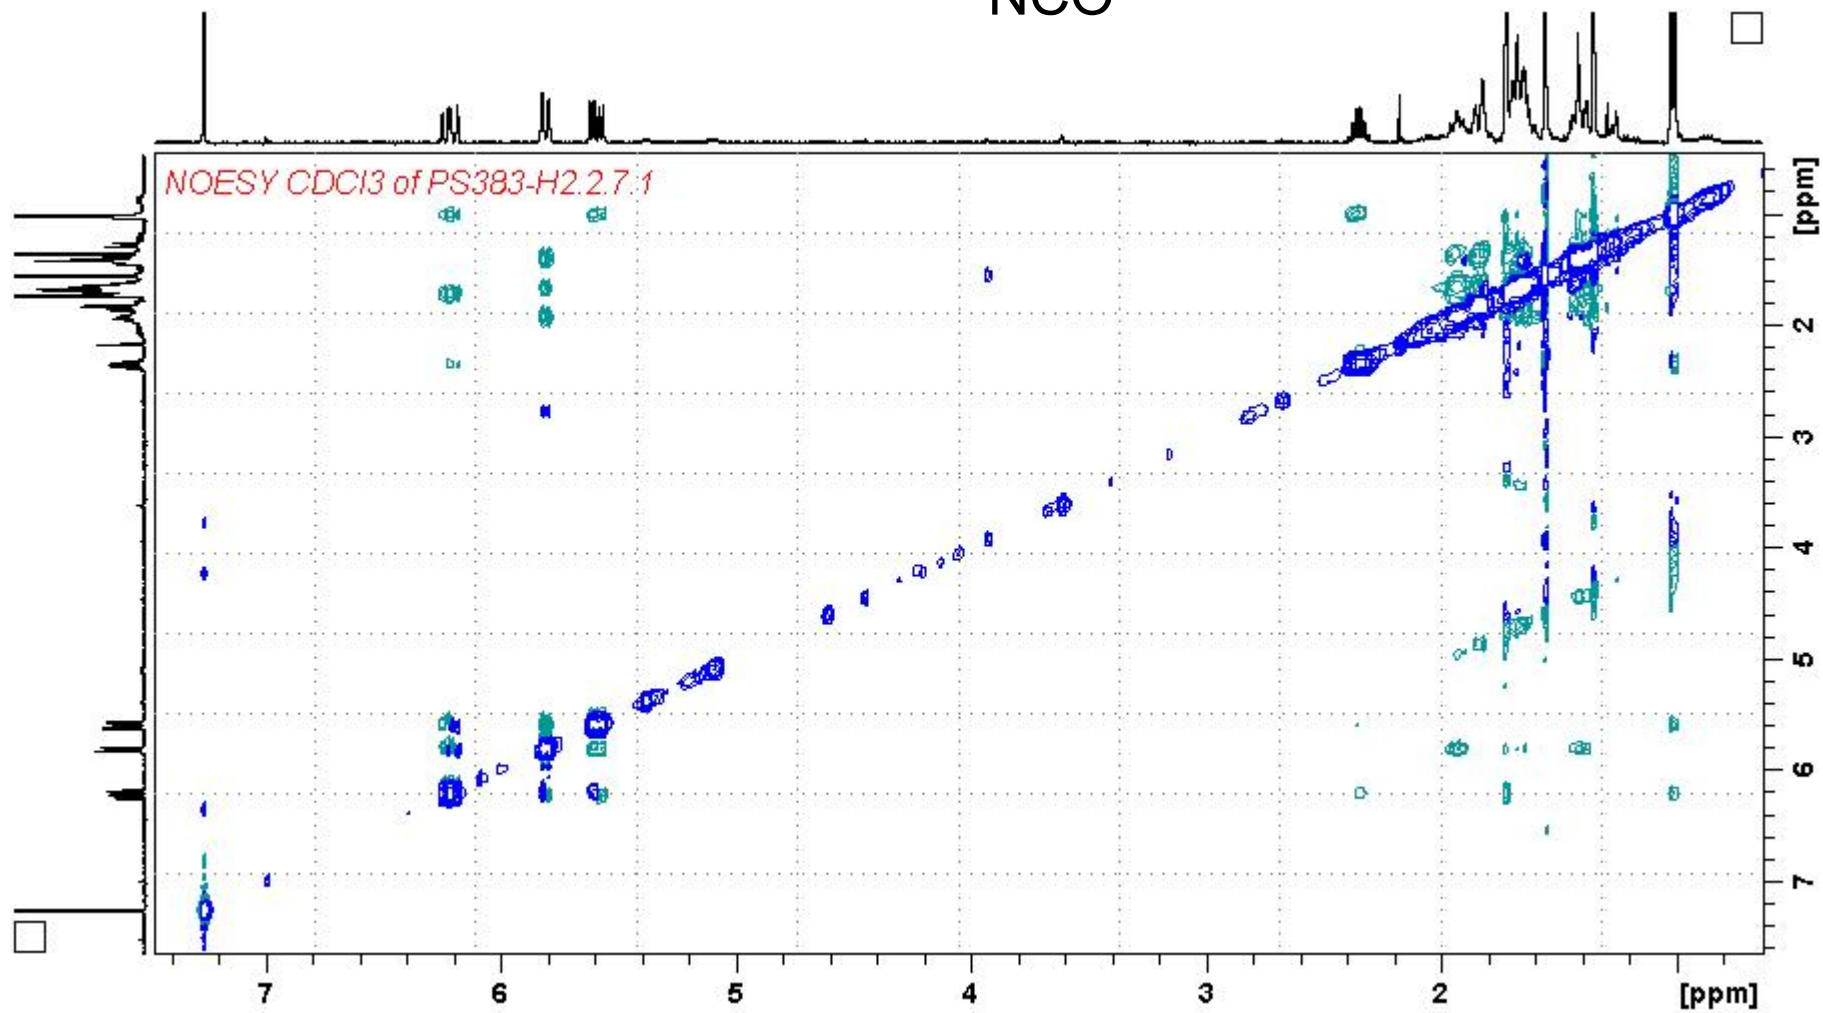

$^1\text{H}$ -NMR spectrum of **2** with traces of **4** and some phthalate

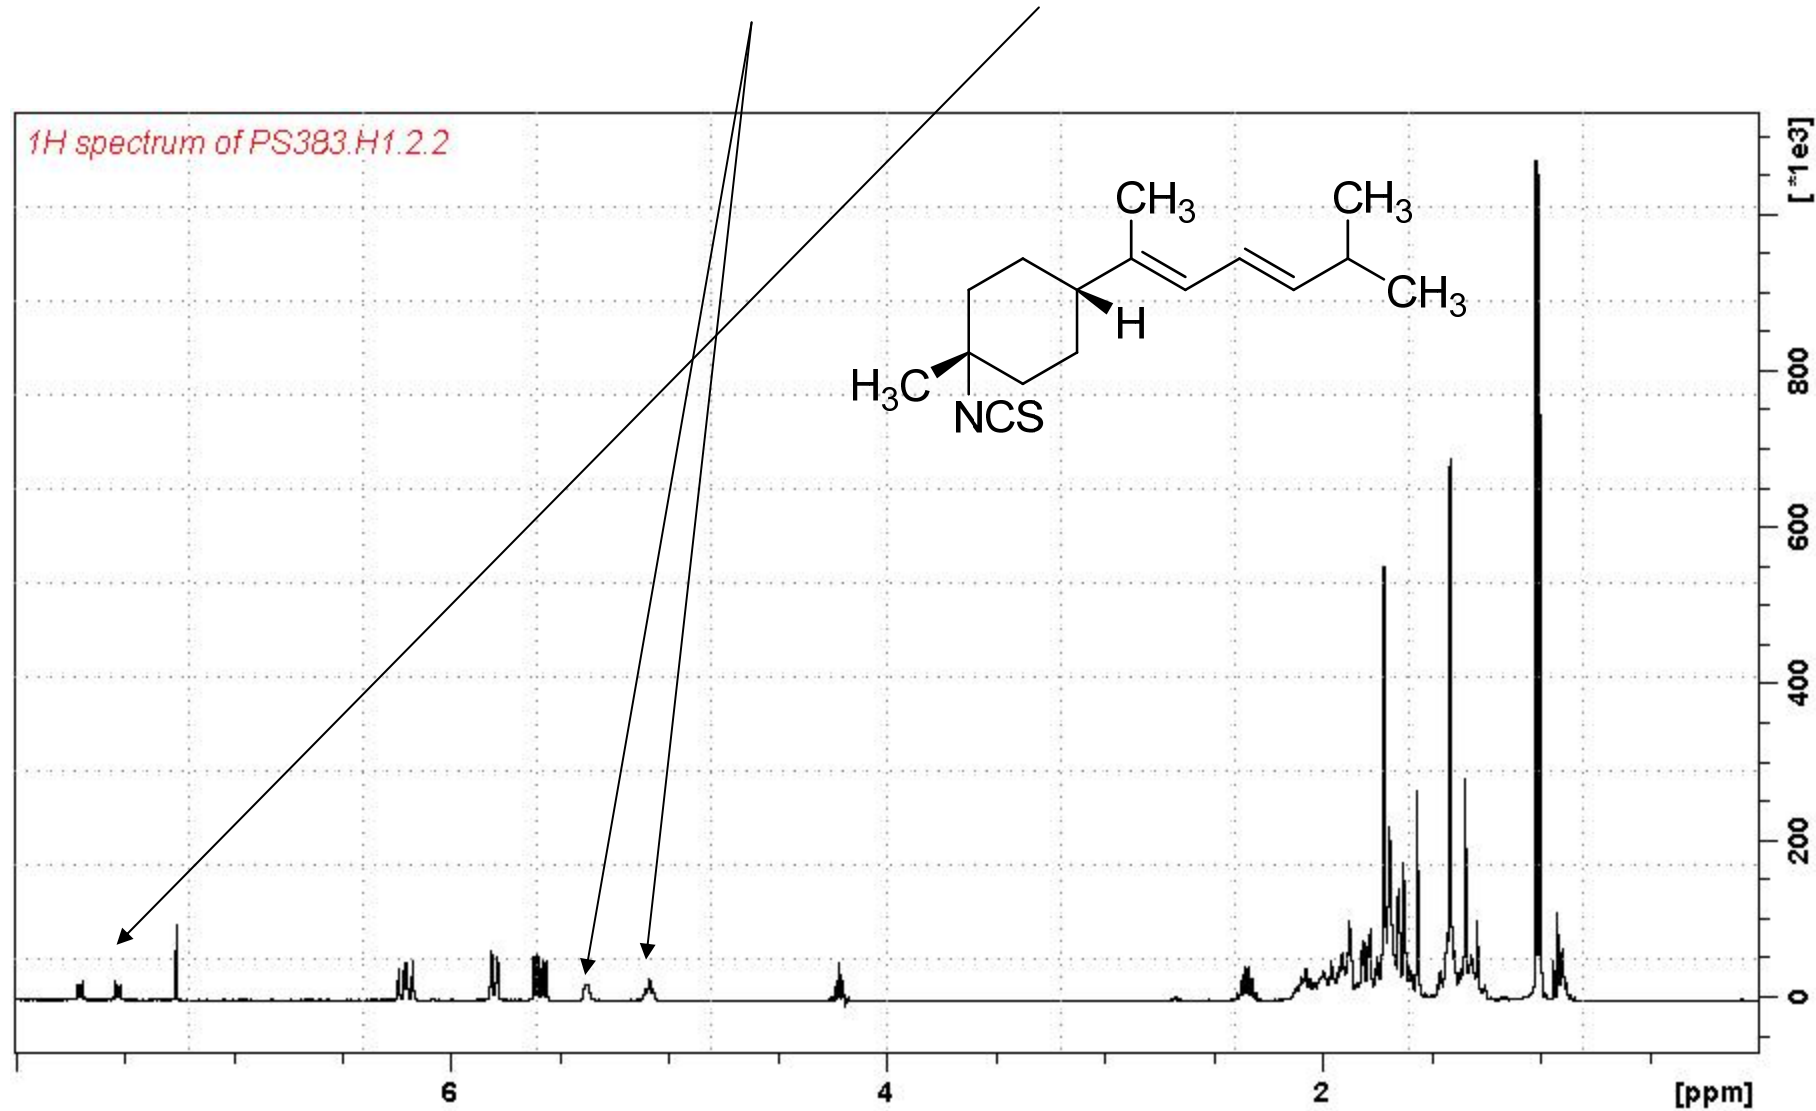

$^{13}\text{C}$ -NMR spectrum of **2** with traces of **4** and some phthalate

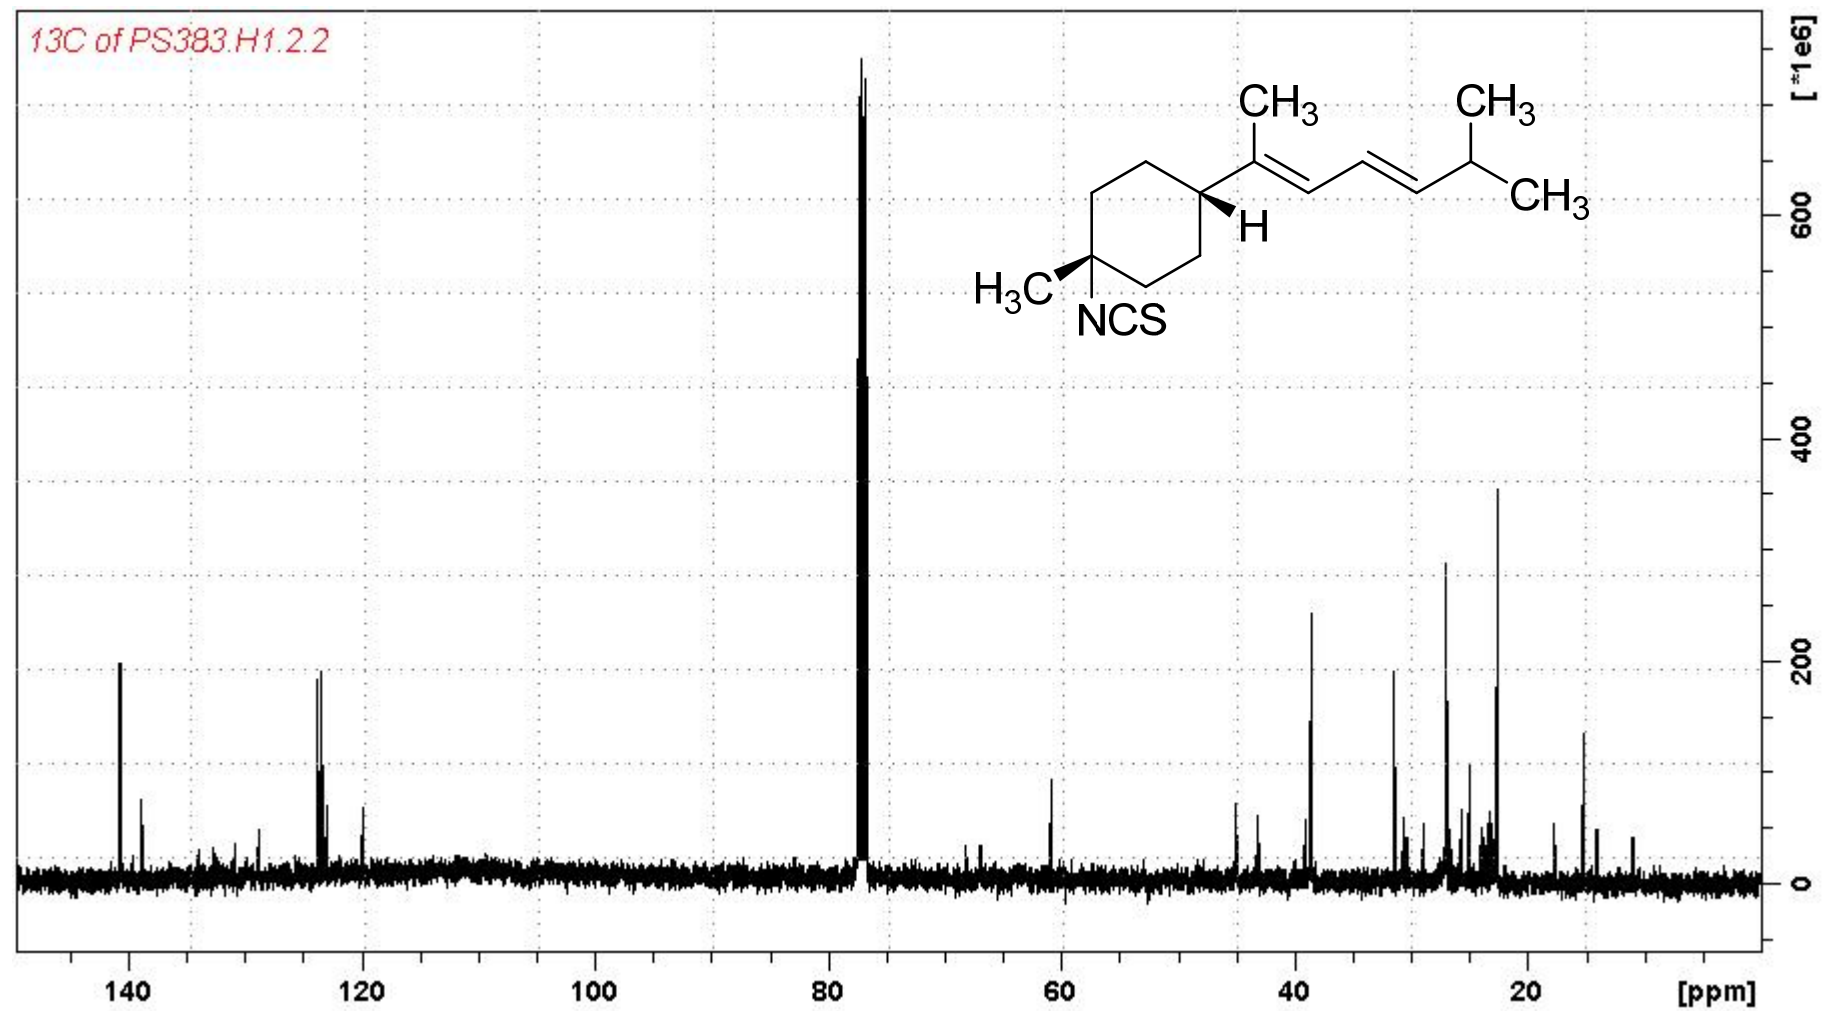

$^1\text{H}$ -NMR spectrum of **3**

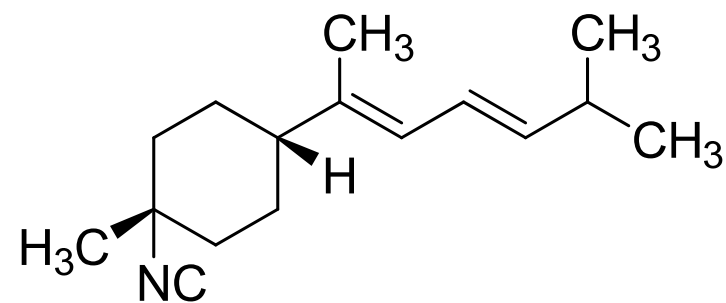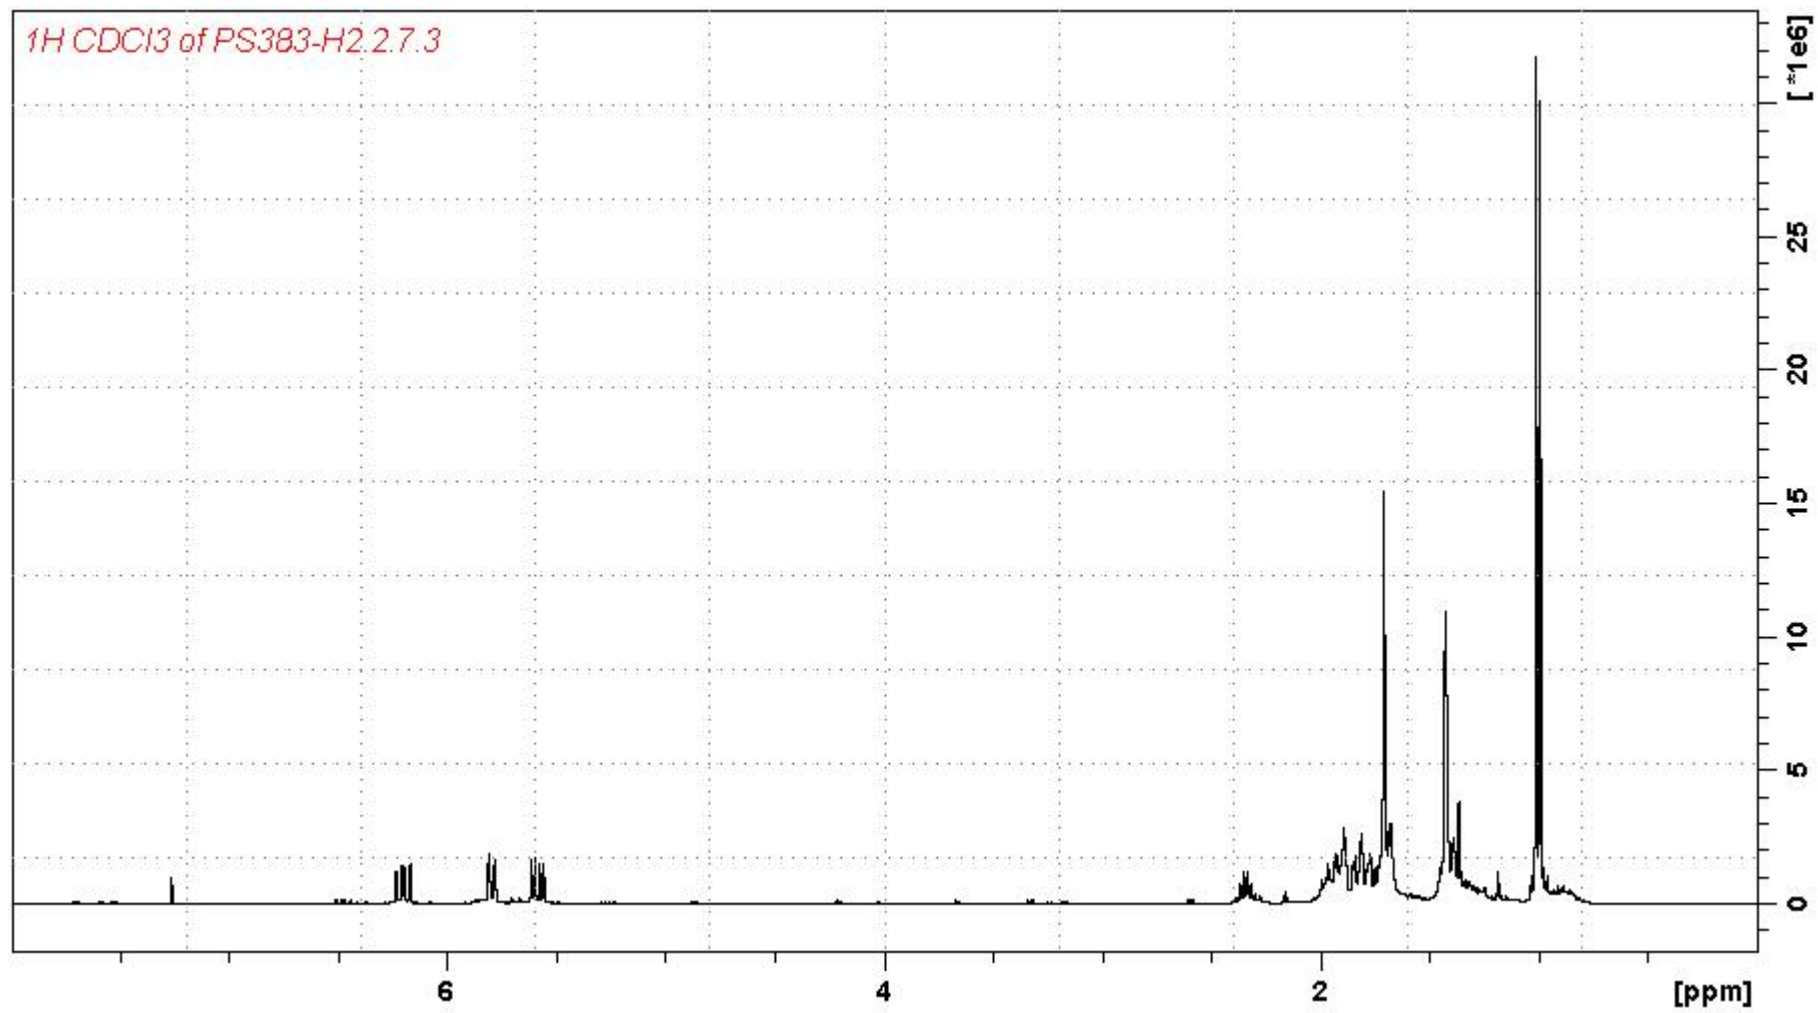

$^{13}\text{C}$ -NMR spectrum of **3**

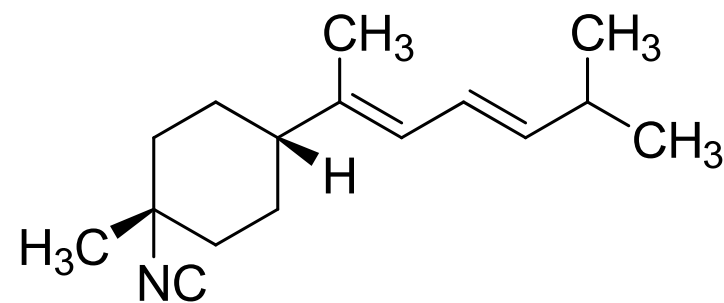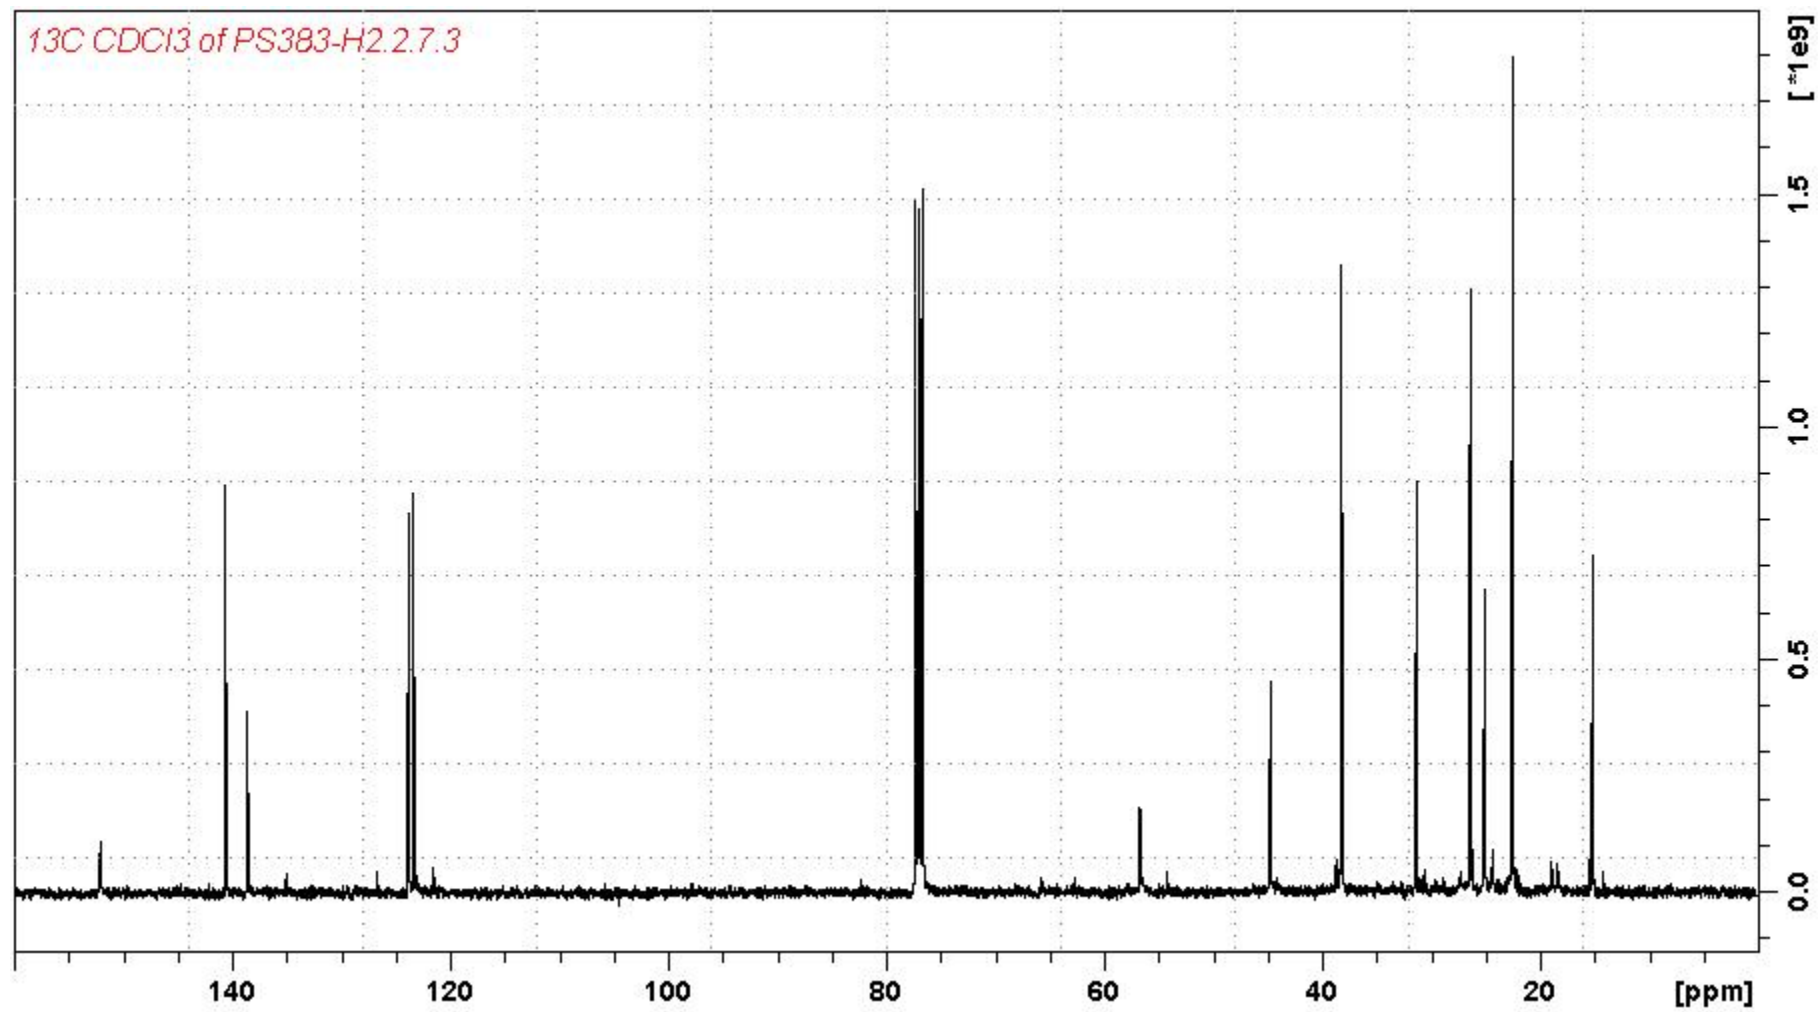

$^1\text{H}$ -NMR spectrum of **4**

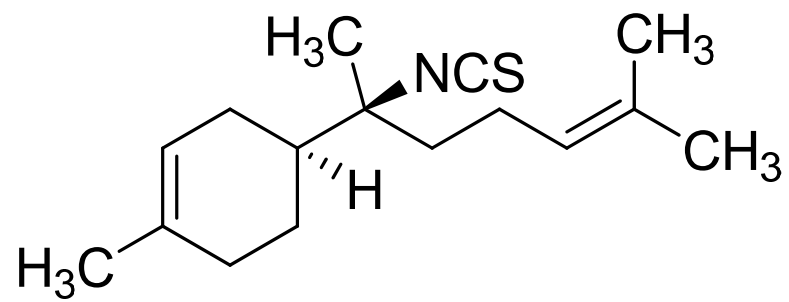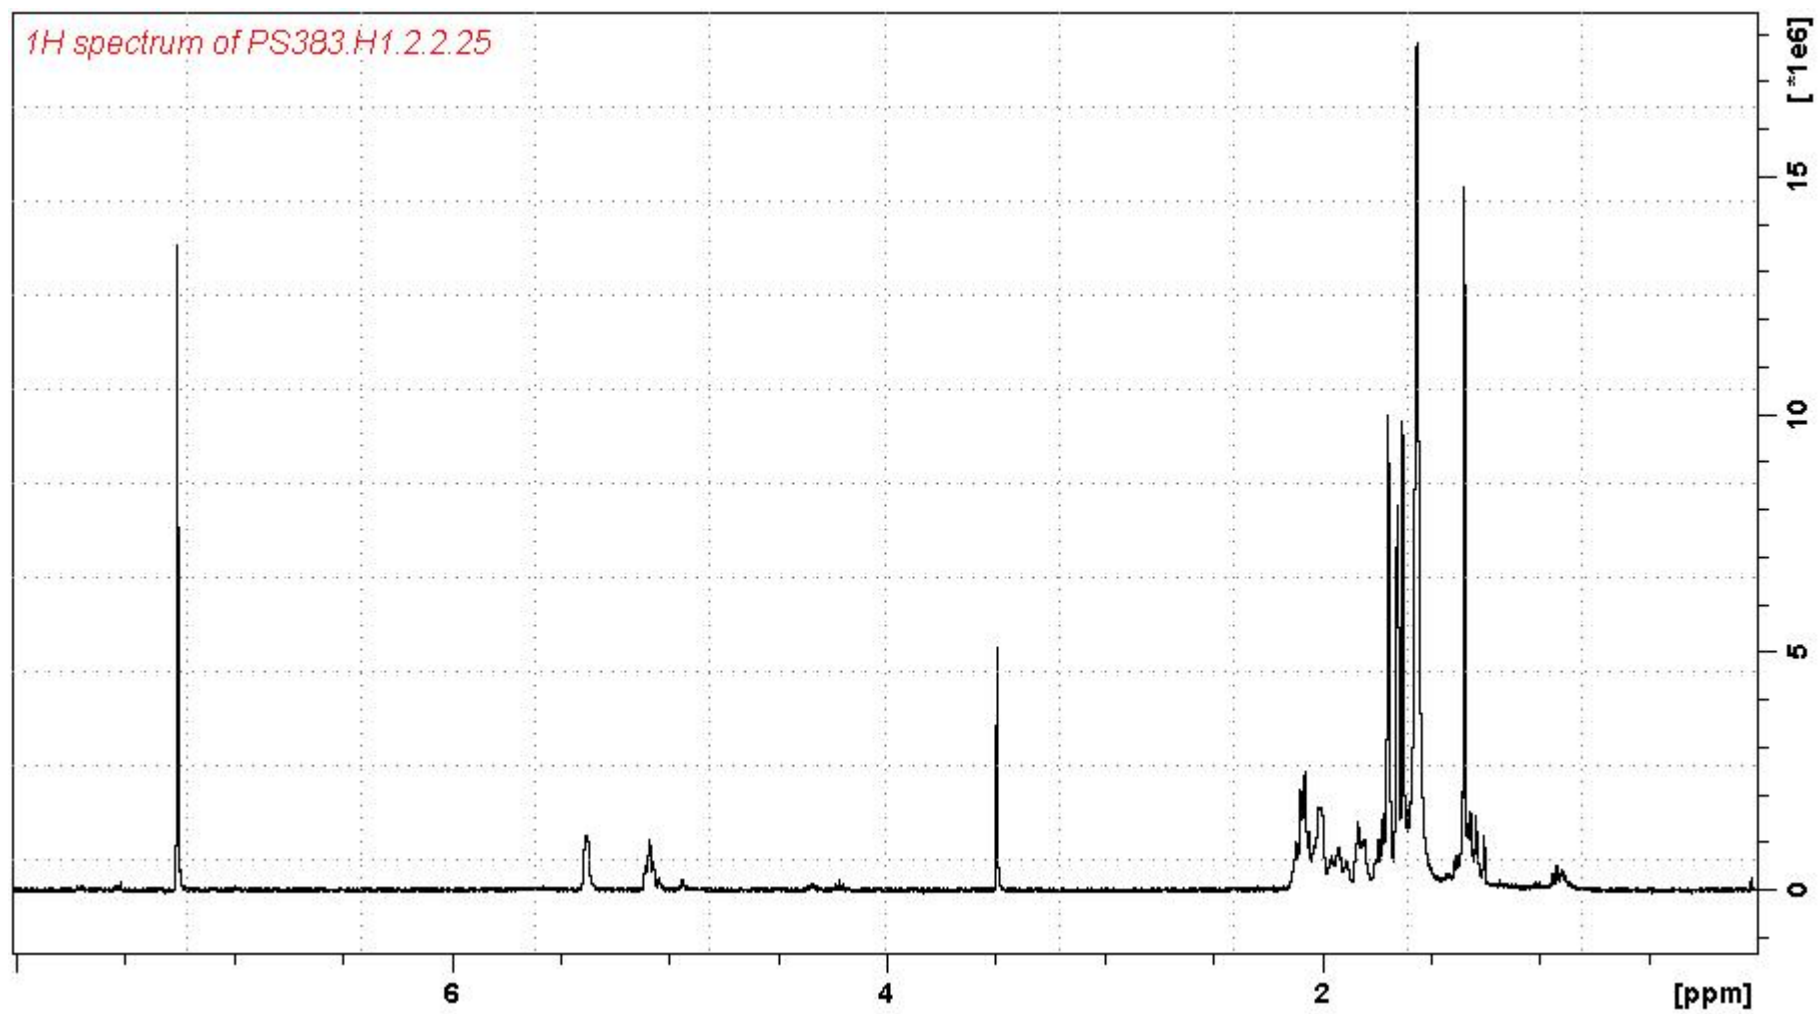



Combined HSQC (Red and purple) and  
HMBC (Blue)-NMR spectra of **4**

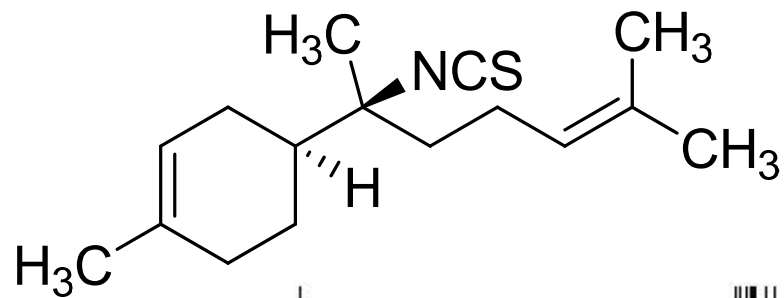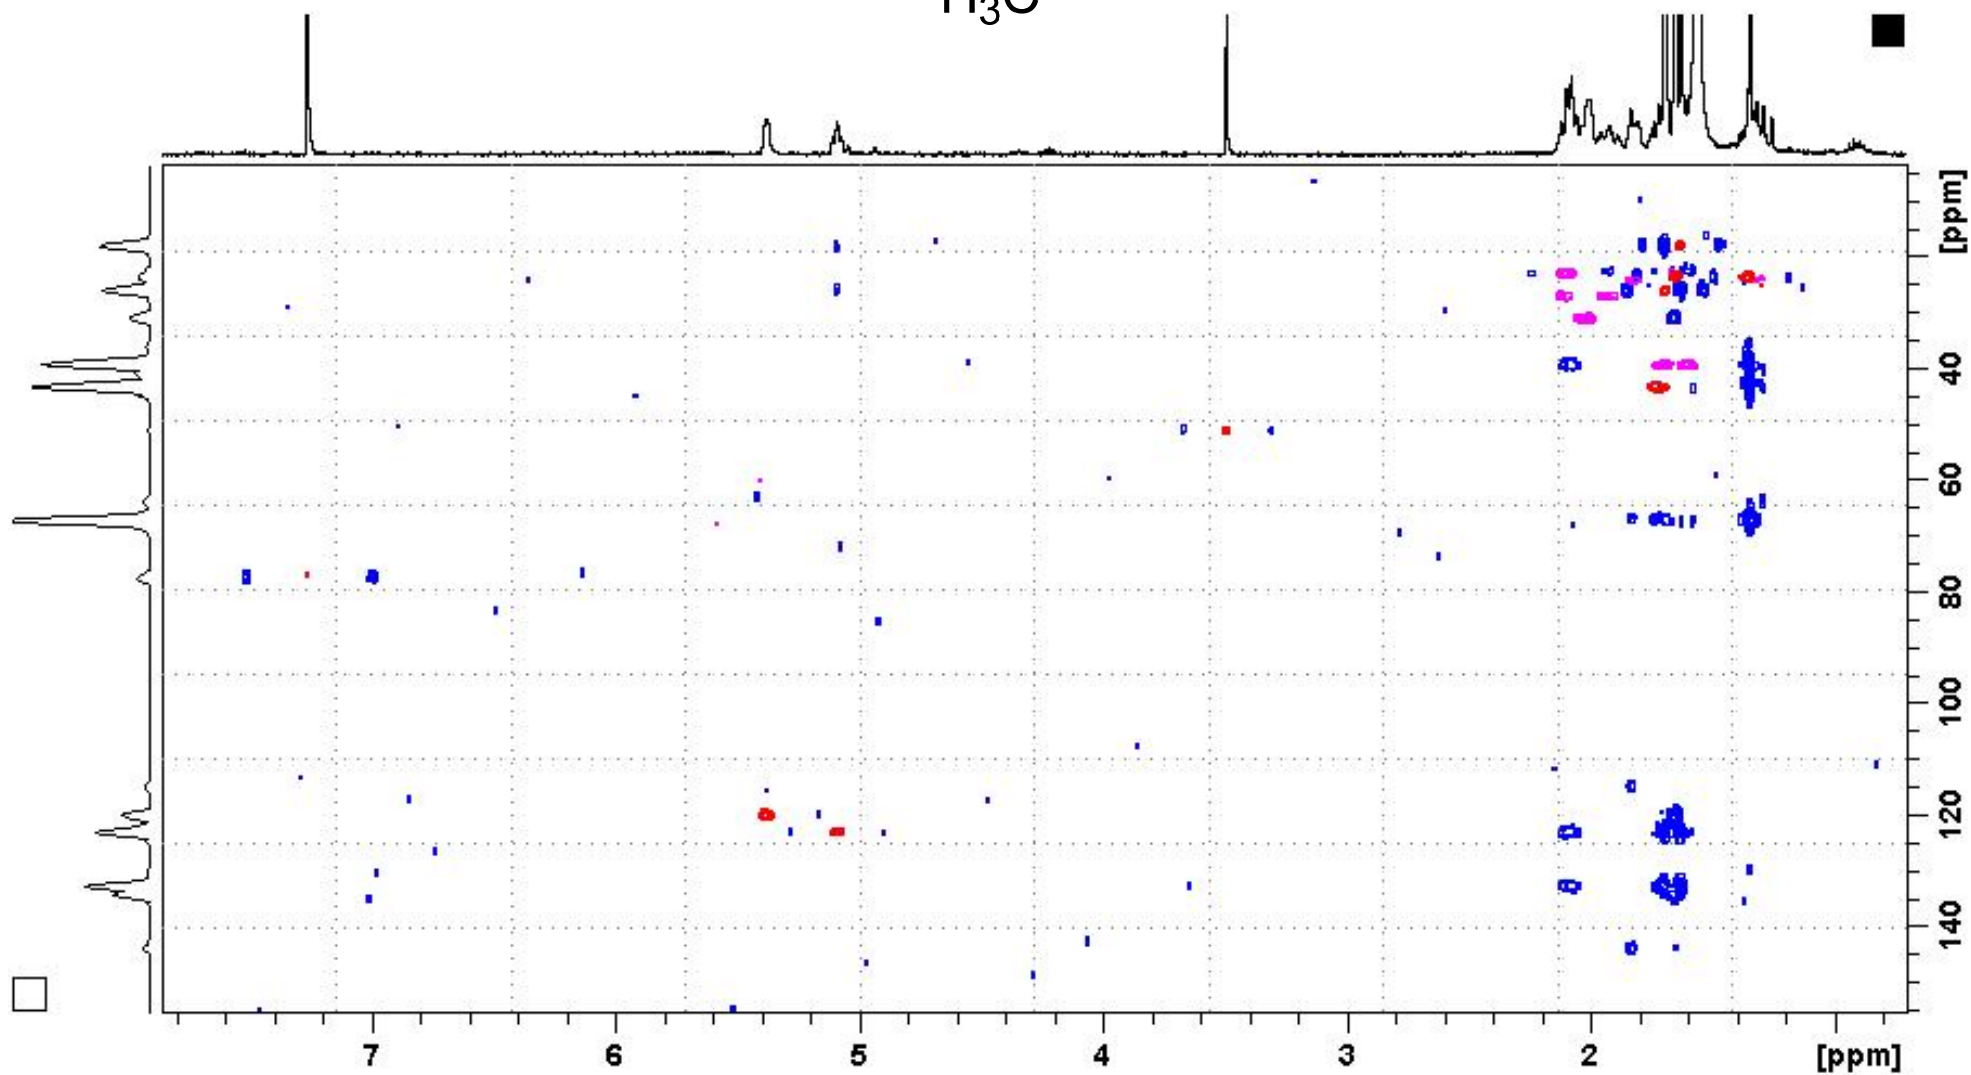

$^1\text{H-NMR}$  spectrum of **5**

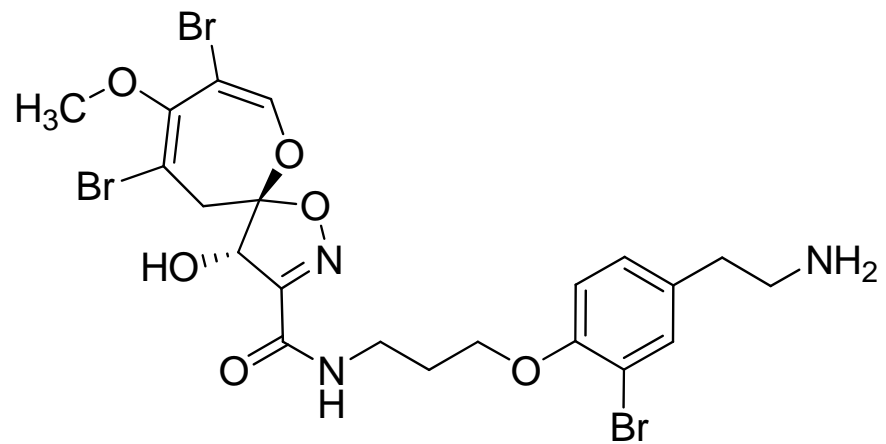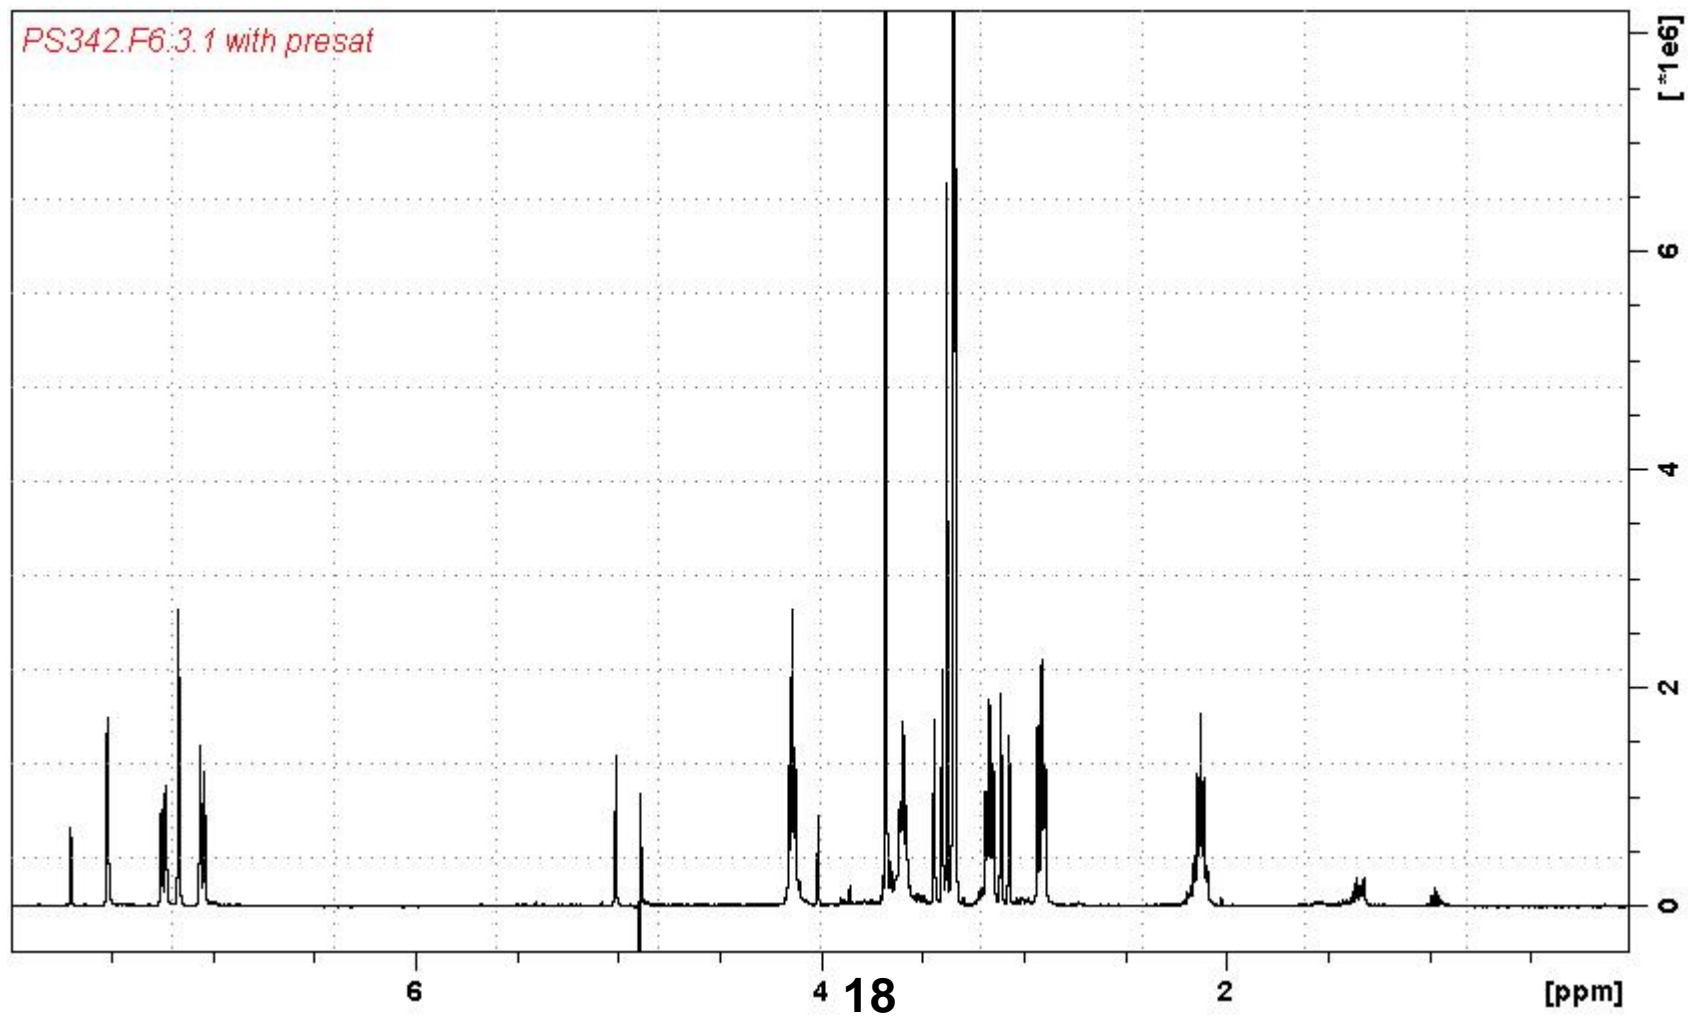

$^{13}\text{C}$ -NMR spectrum of **5**

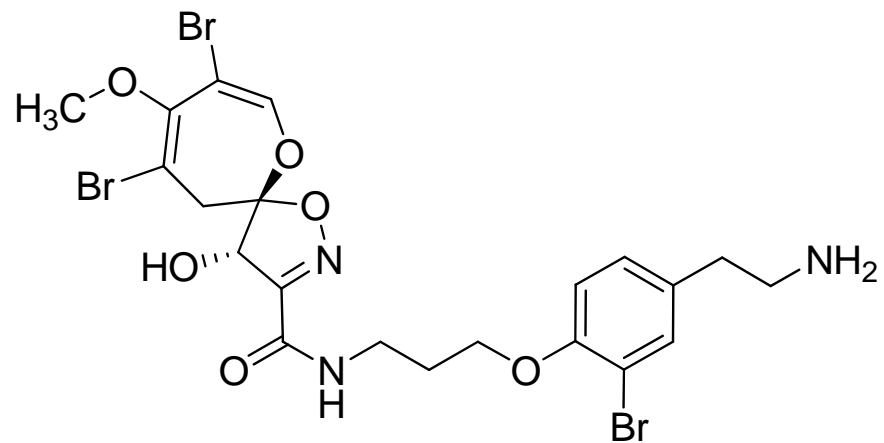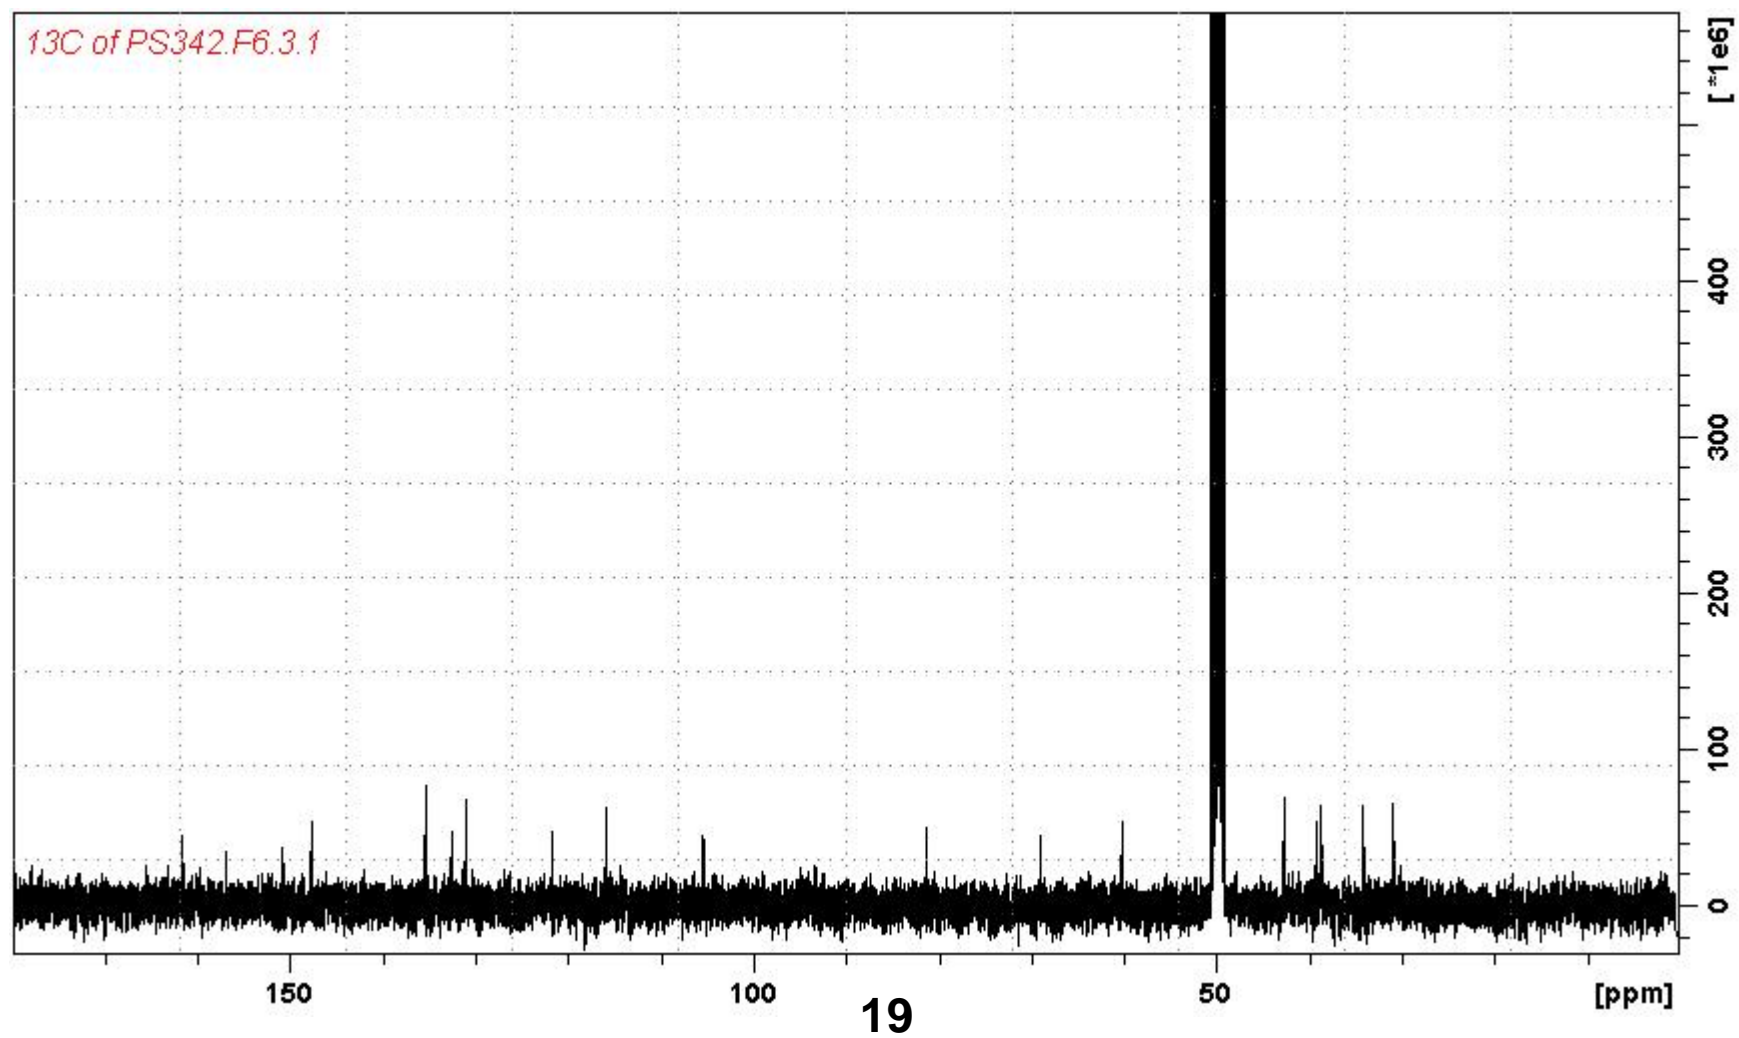

COSY-NMR spectrum of **5**

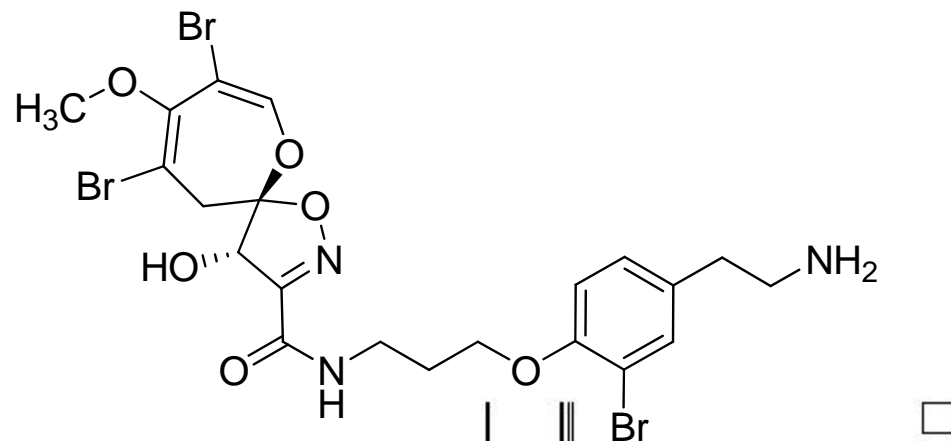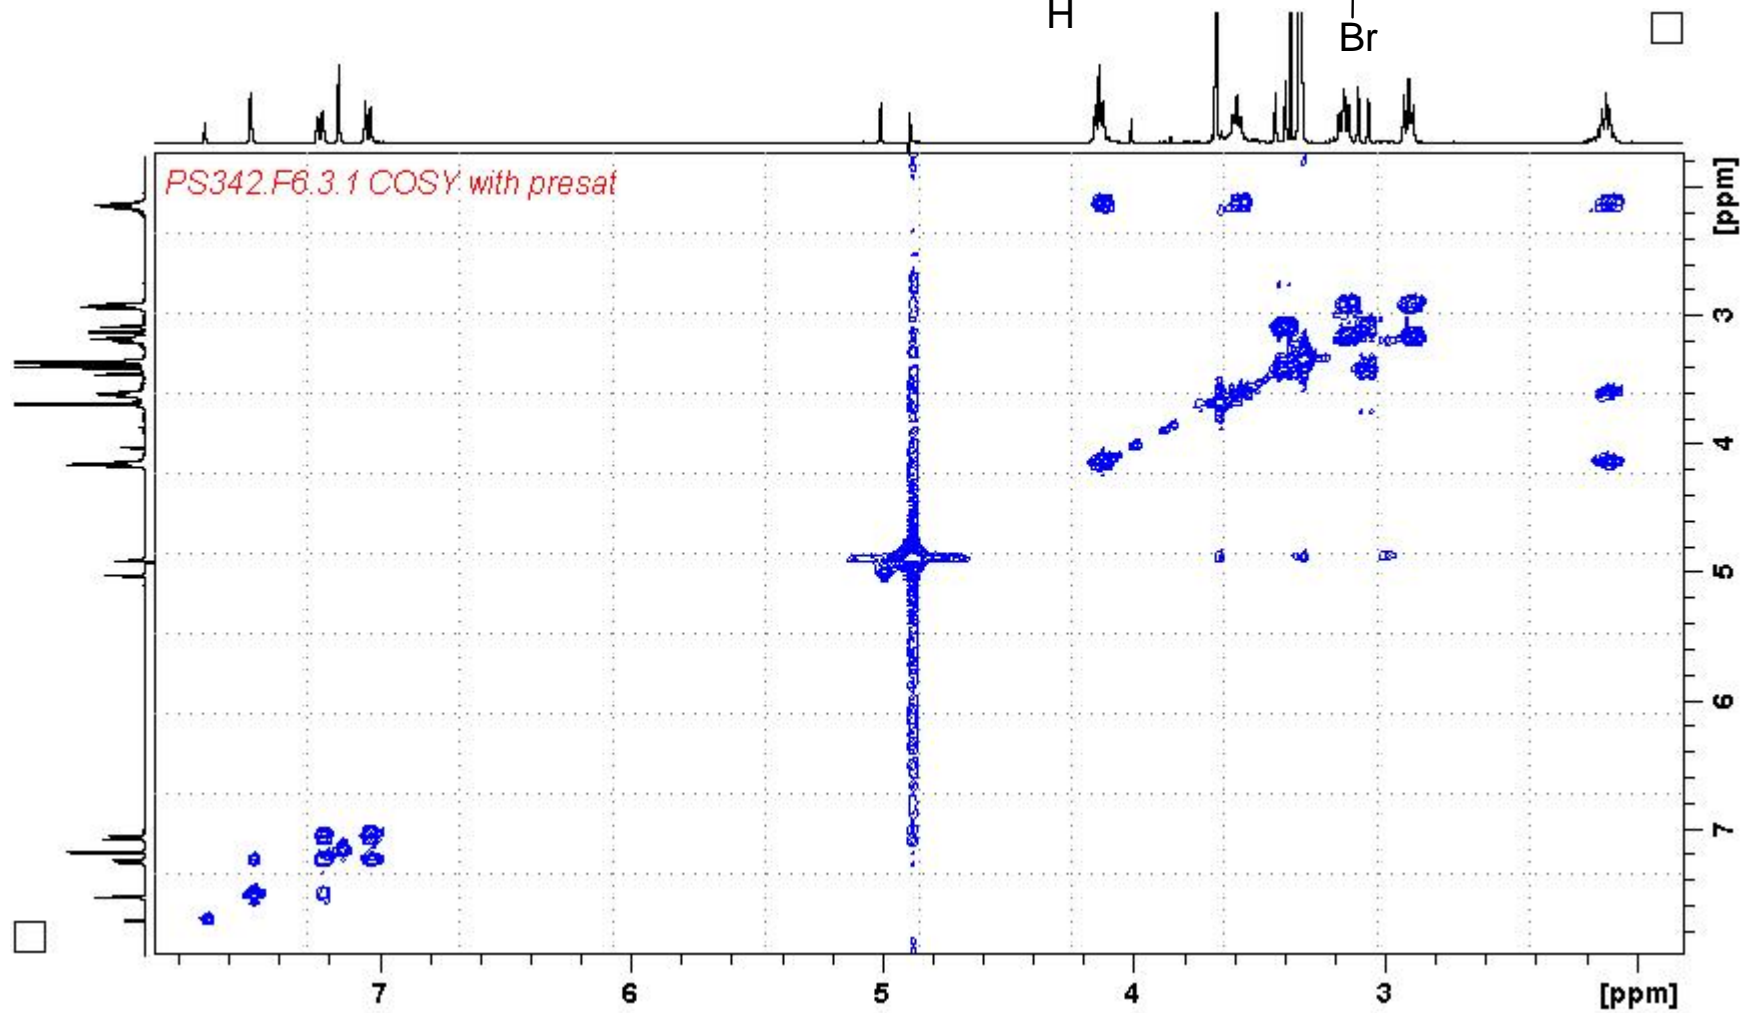

# HMBC-NMR spectrum of **5**

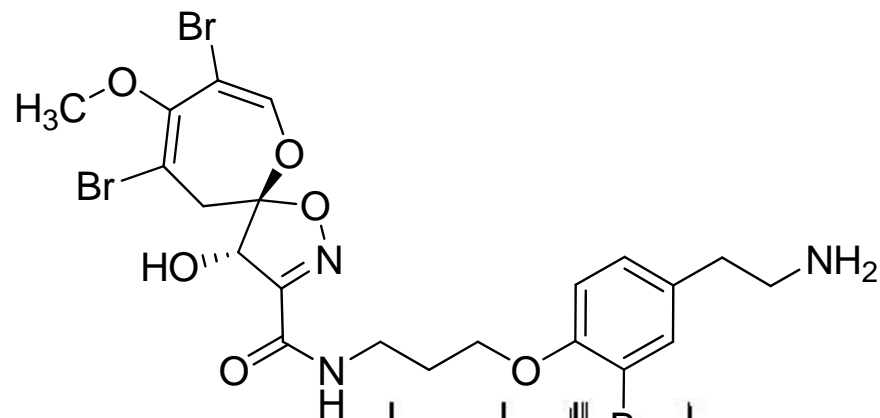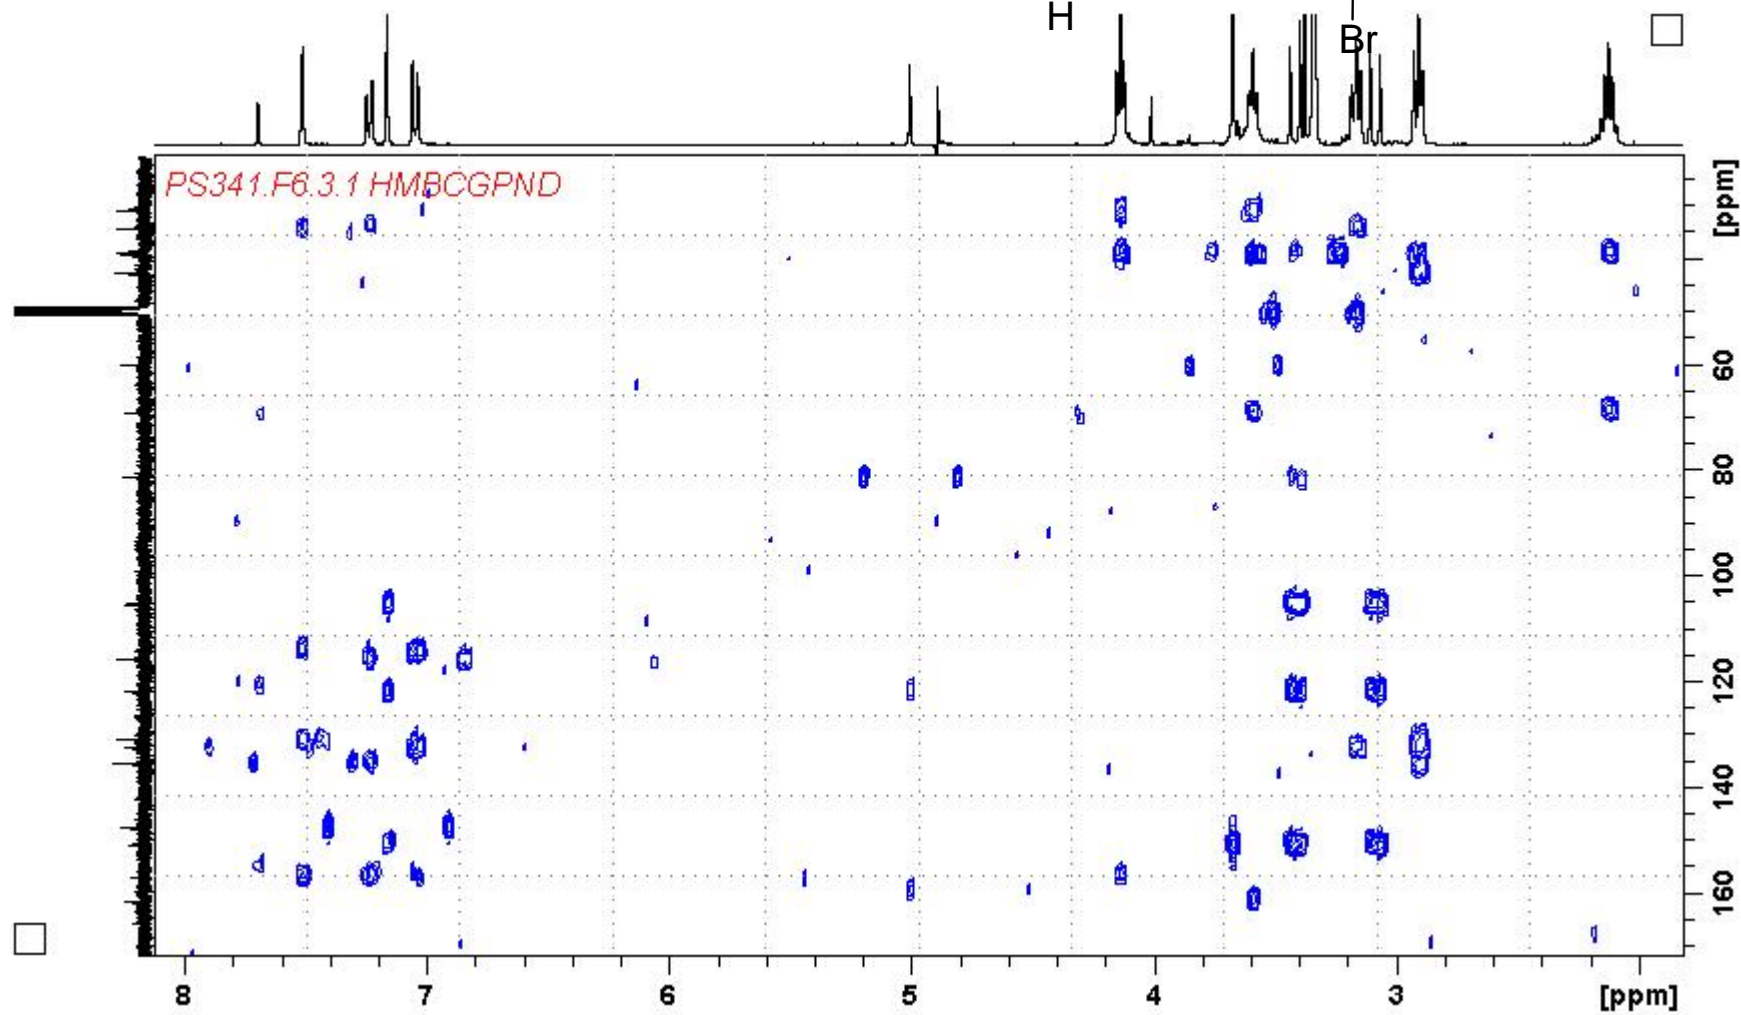

HSQC-NMR spectrum of **5**

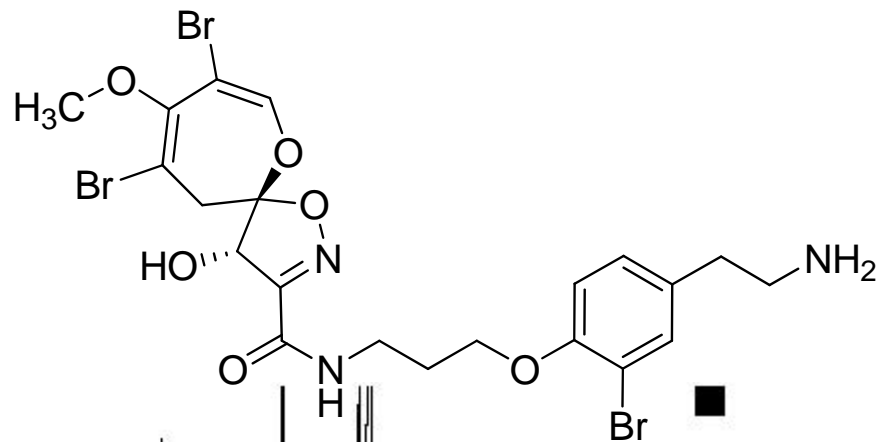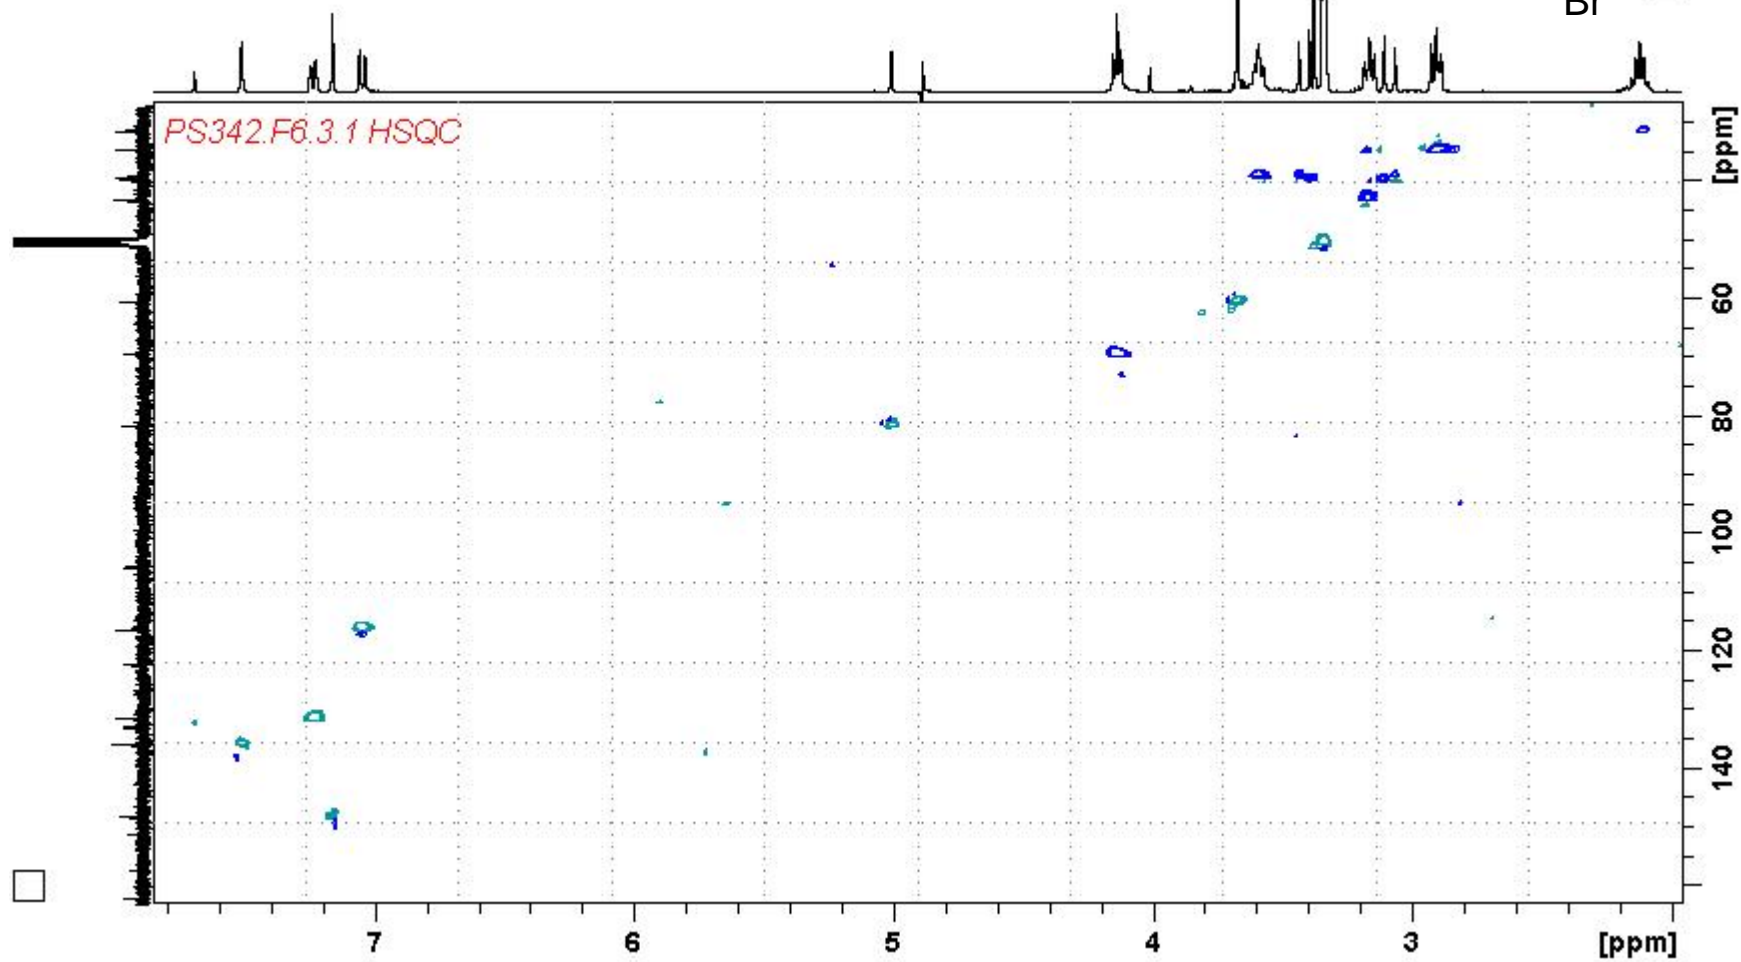

NOESY-NMR spectrum of **5**

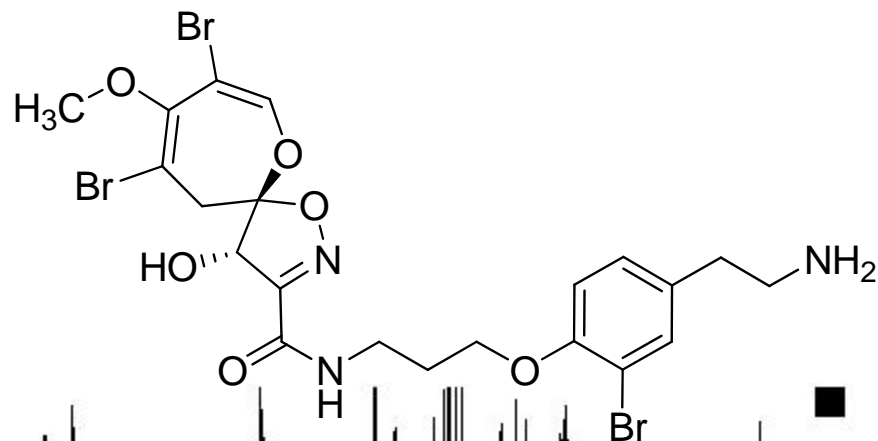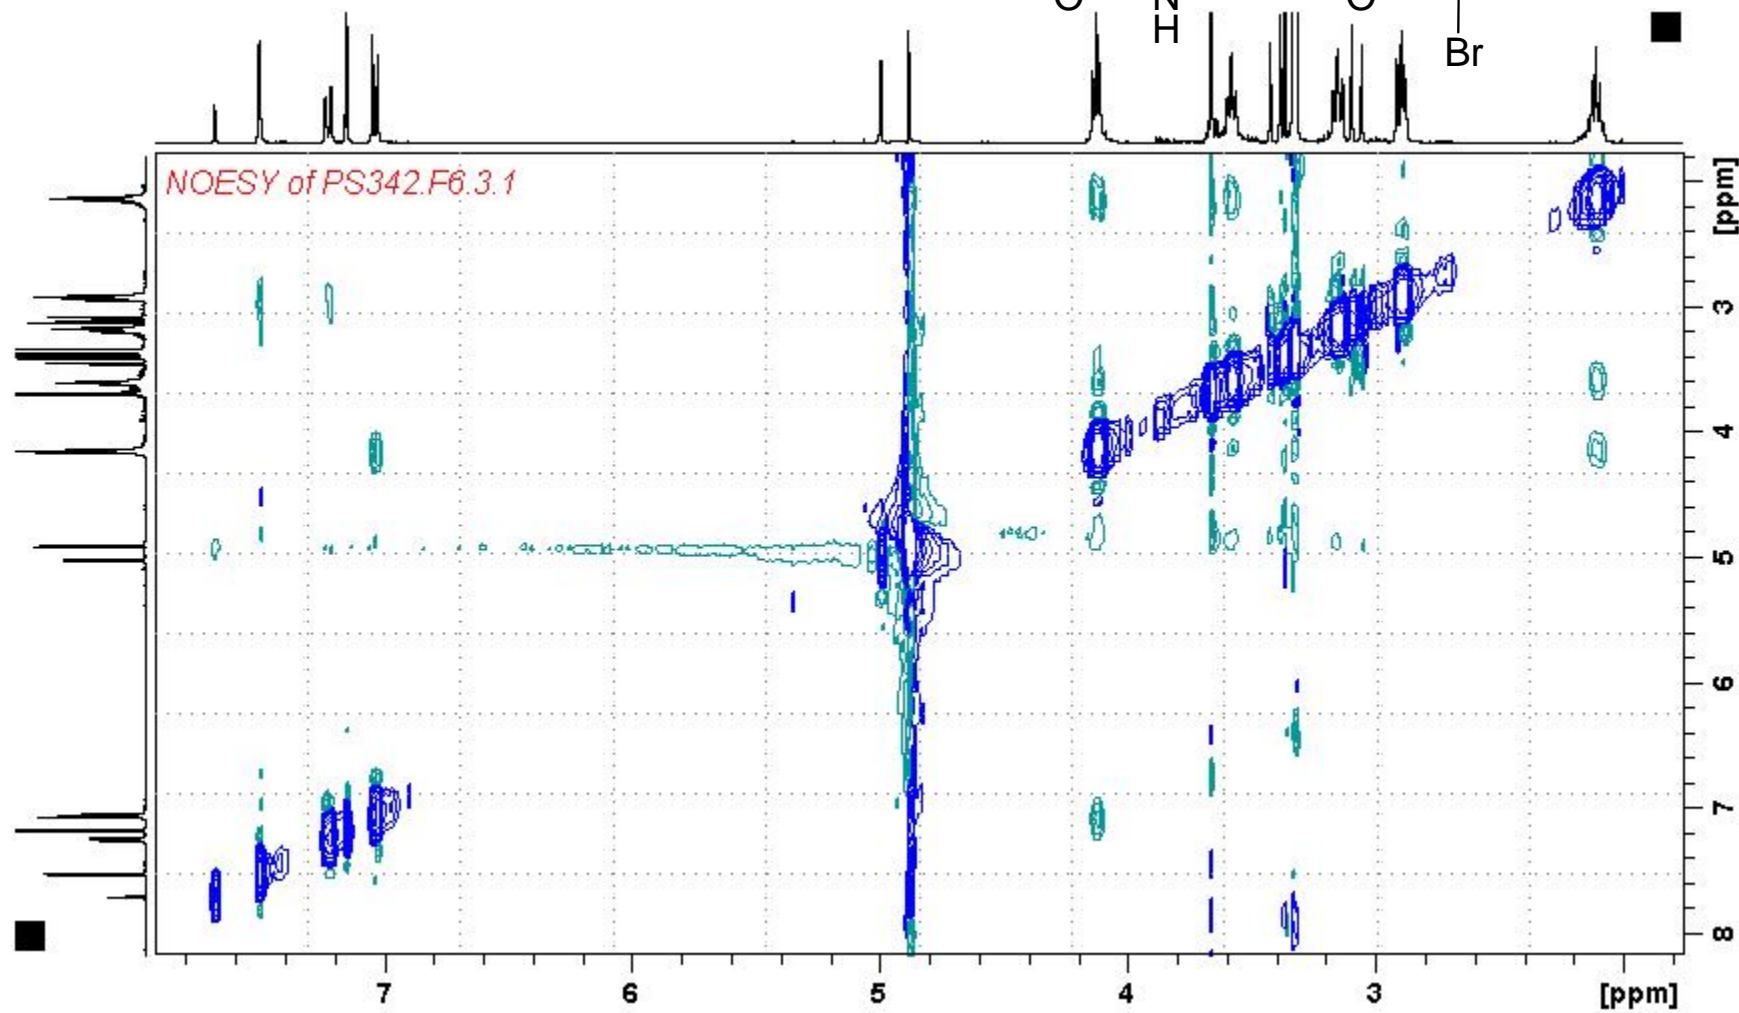

$^1\text{H-NMR}$  spectra of 3:2 mixture of **5** and **6** (Black),  $^1\text{H-NMR}$  of **5** (Red), and their difference spectra (Green). Hence the green spectrum is the  $^1\text{H-NMR}$  spectrum of **6**

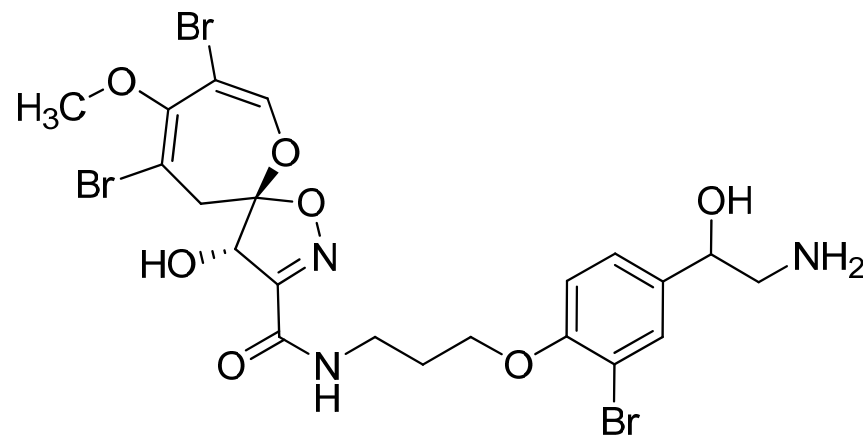

All spectra were recorded with presat of the HOD peak at about  $\delta 4.9$

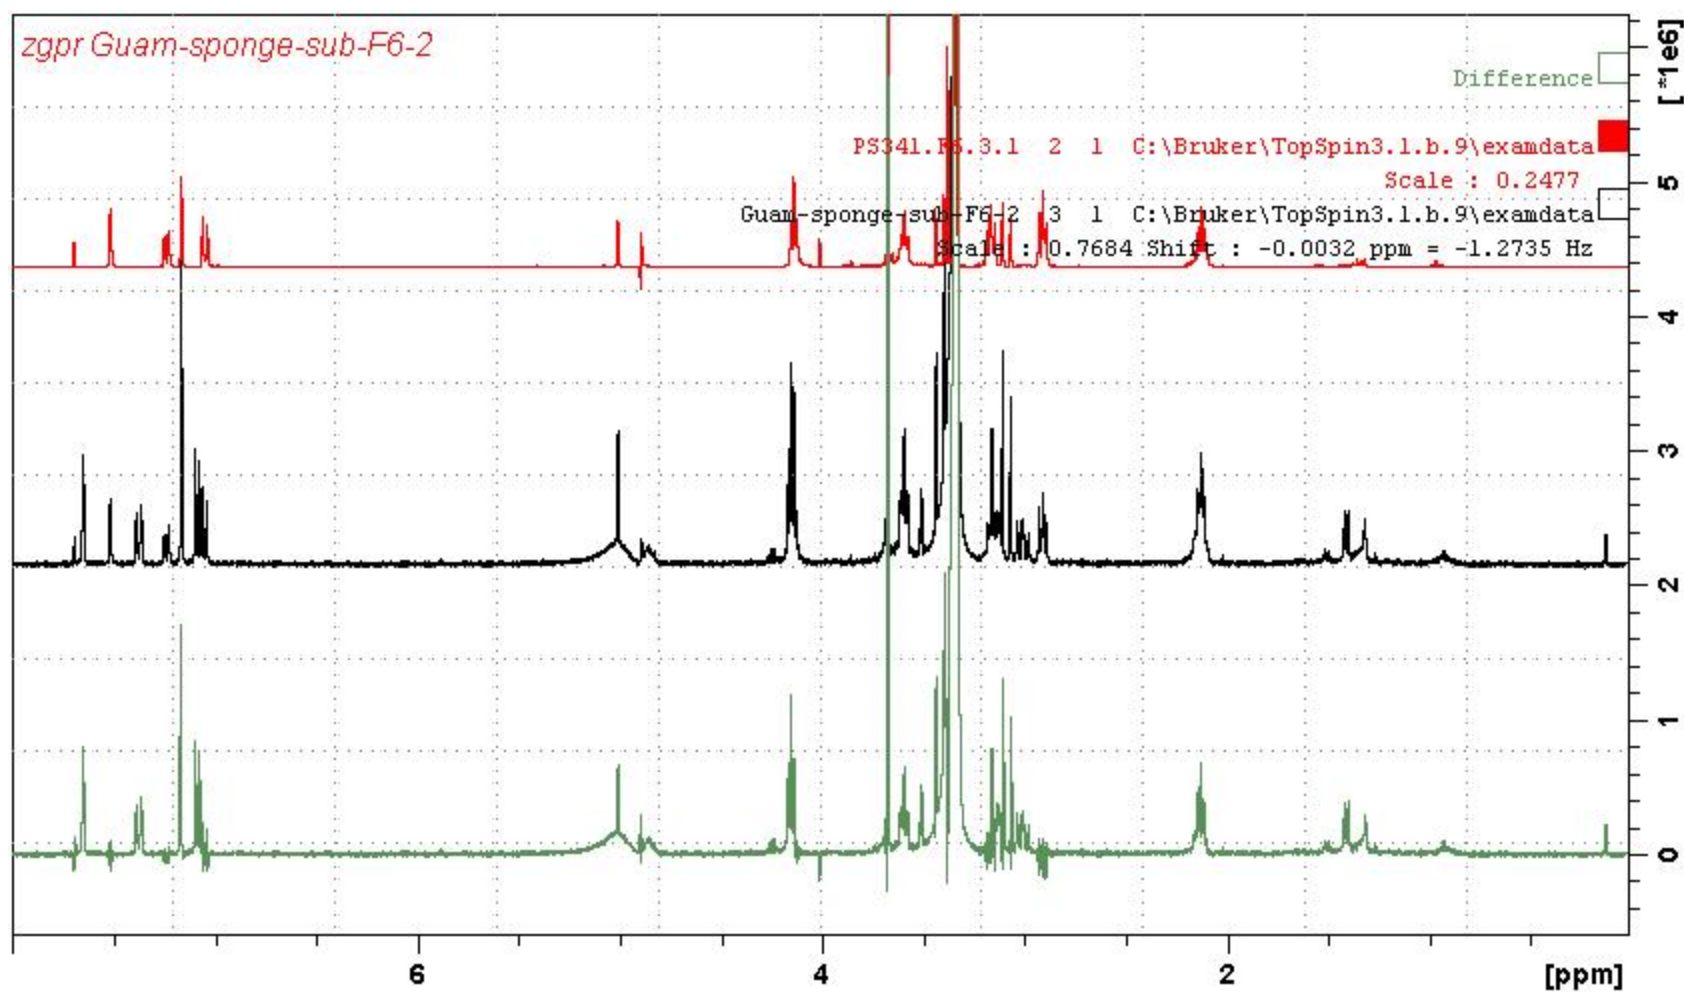



COSY-NMR spectrum of **6**  
3:2 Mixture of **5** and **6**

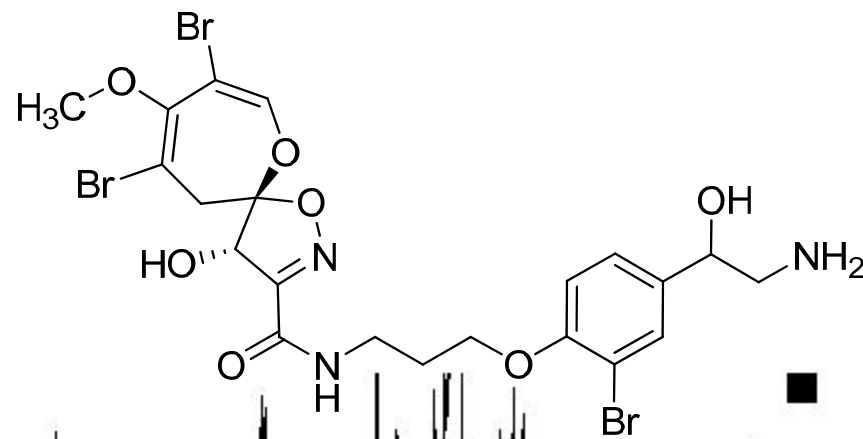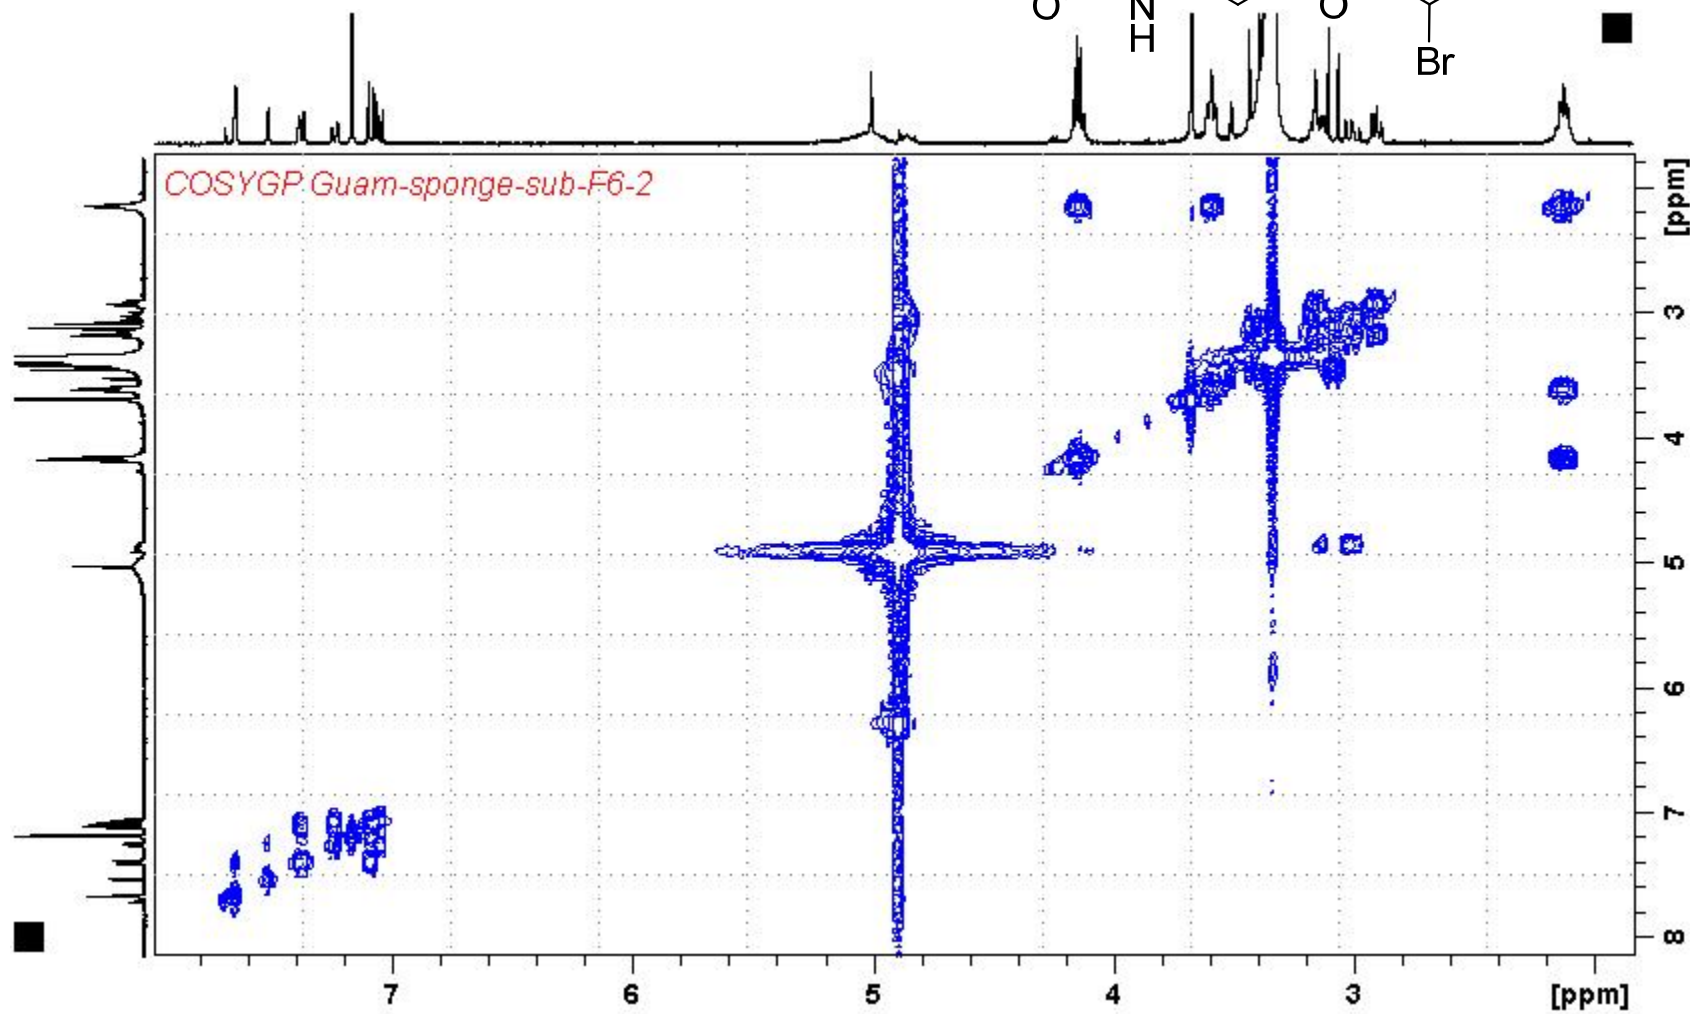

HMBC-NMR spectrum of **6**  
3:2 Mixture of **5** and **6**

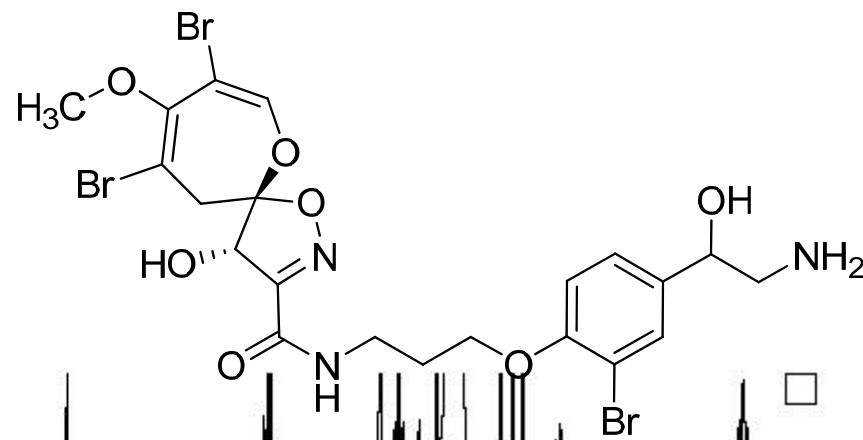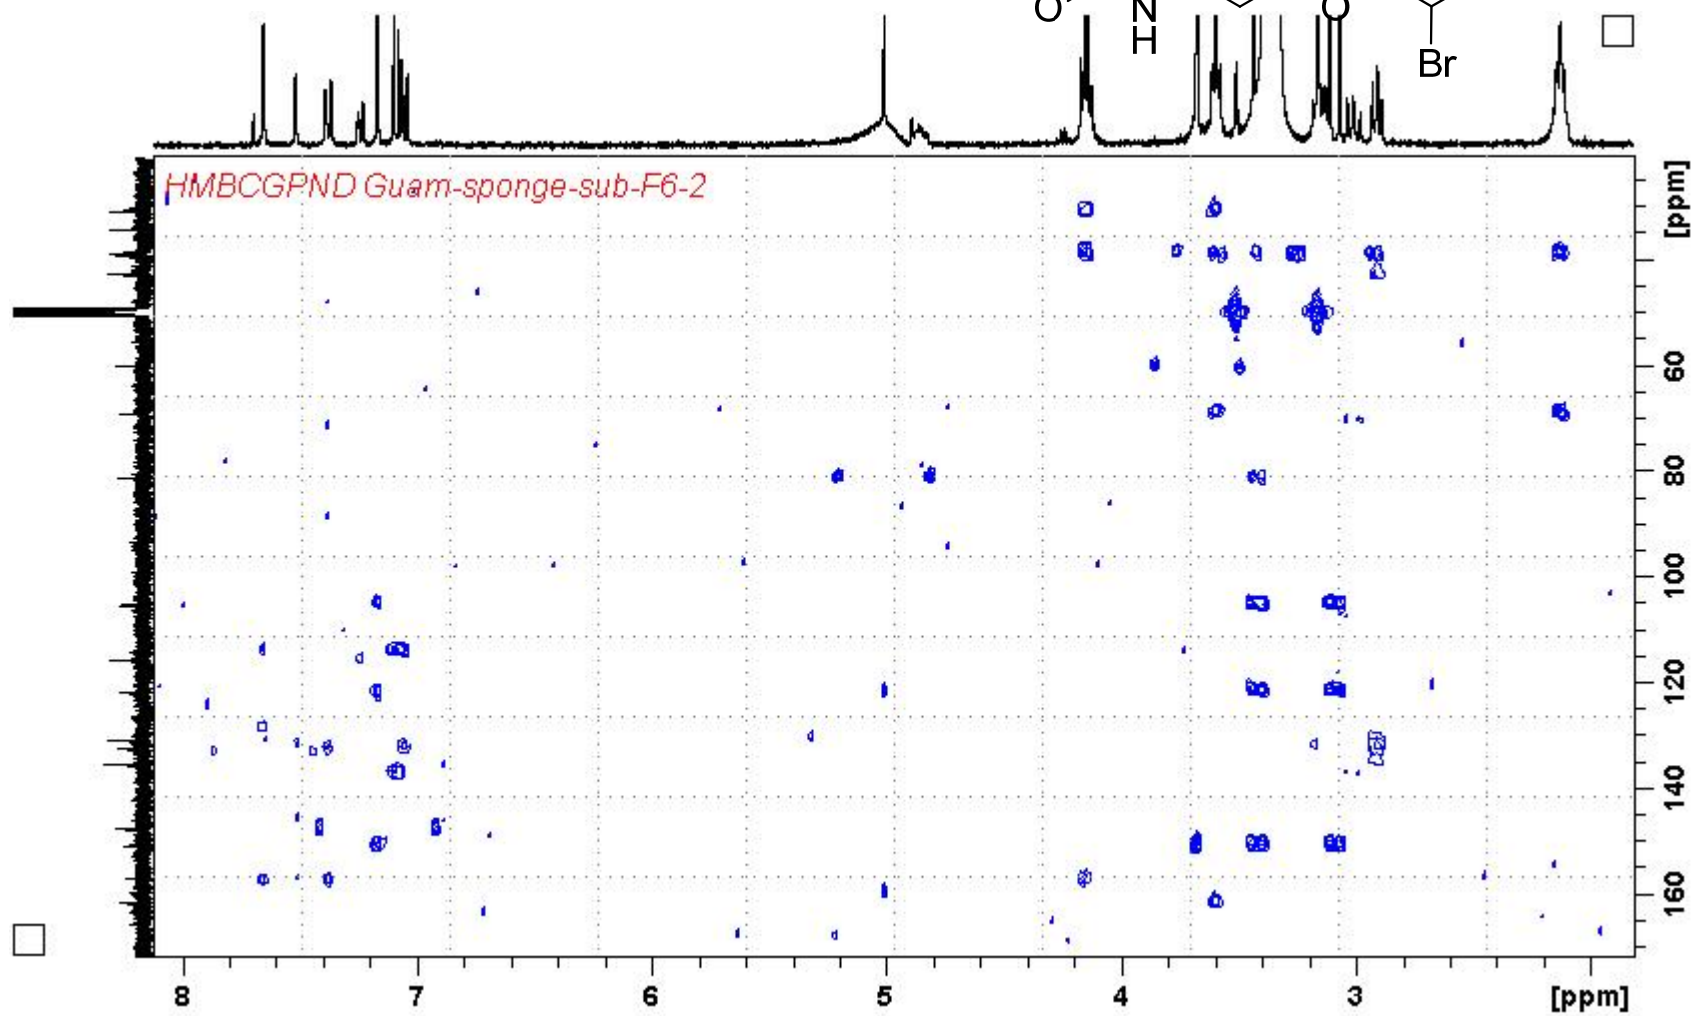

HSQC-NMR spectrum of **6**  
3:2 Mixture of **5** and **6**

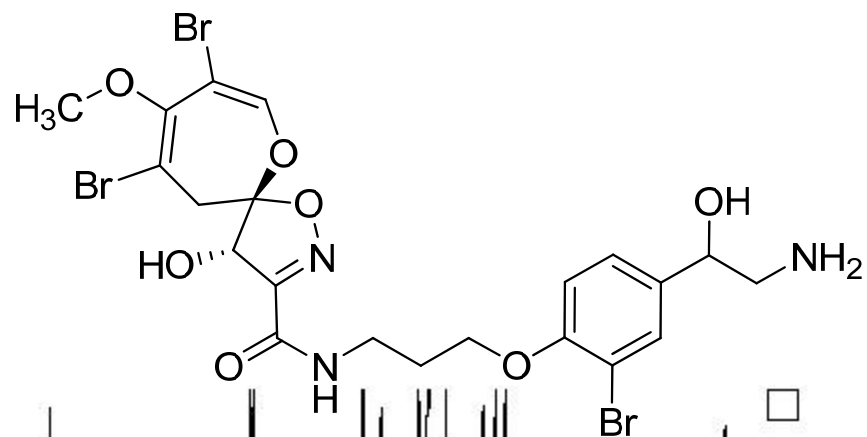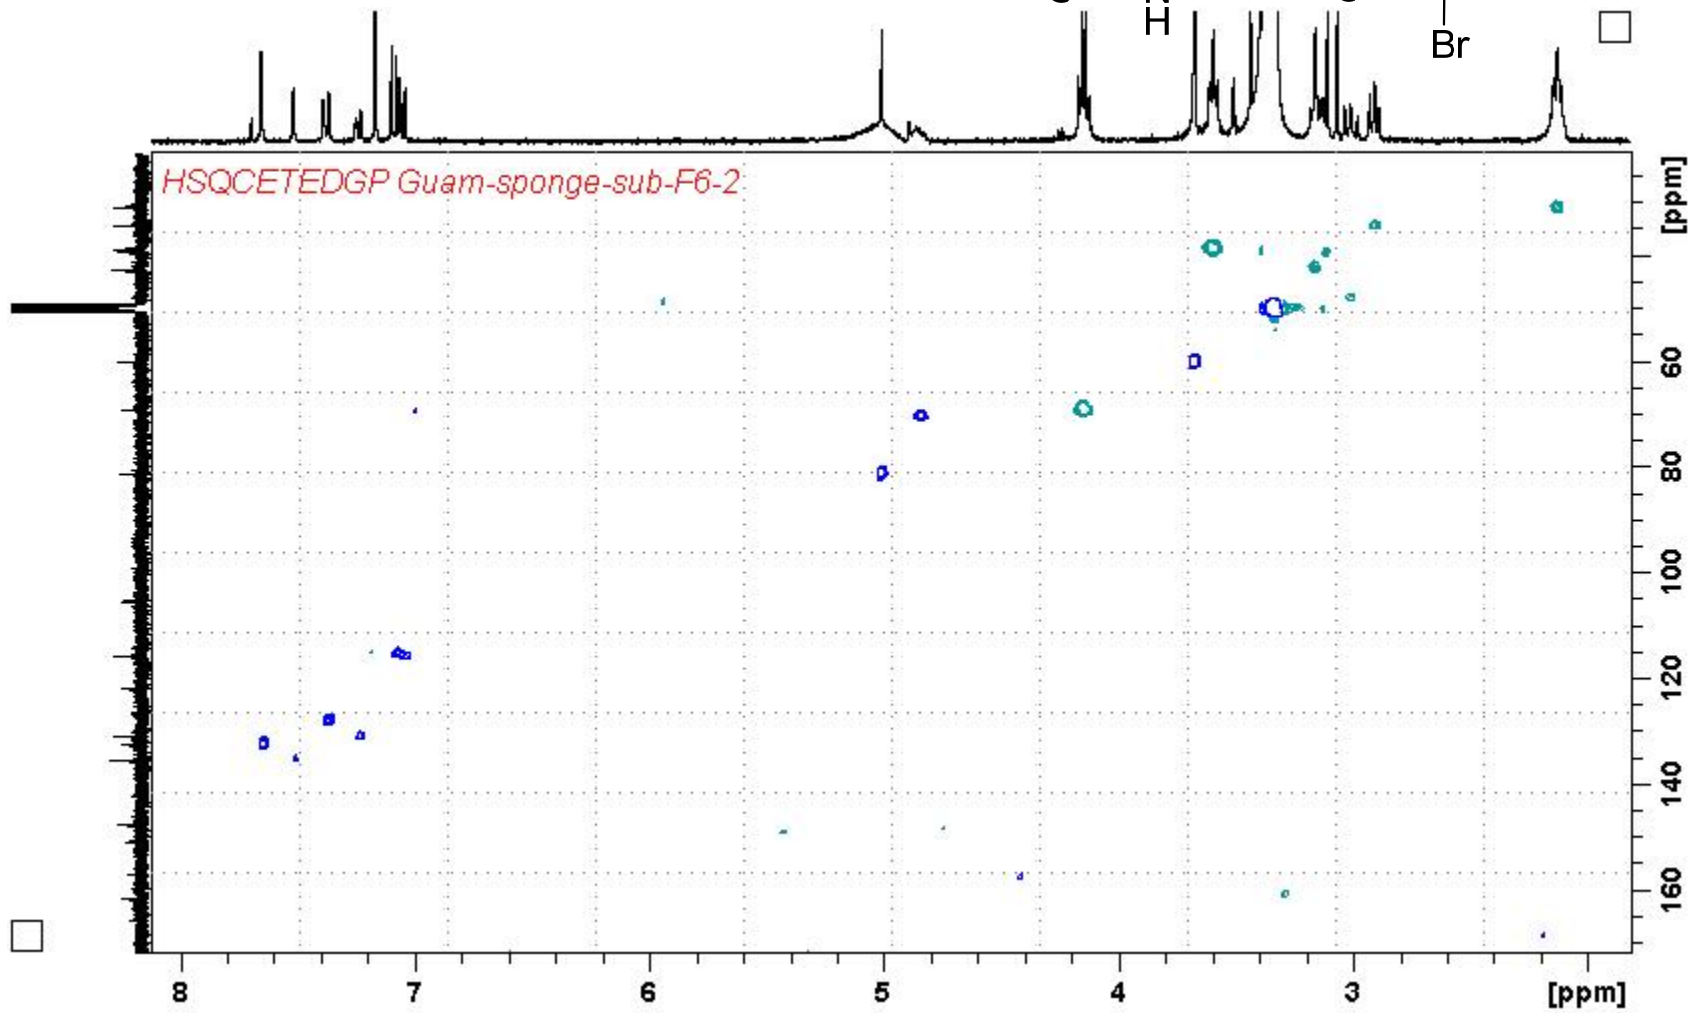

<sup>1</sup>H-NMR spectrum of **7**

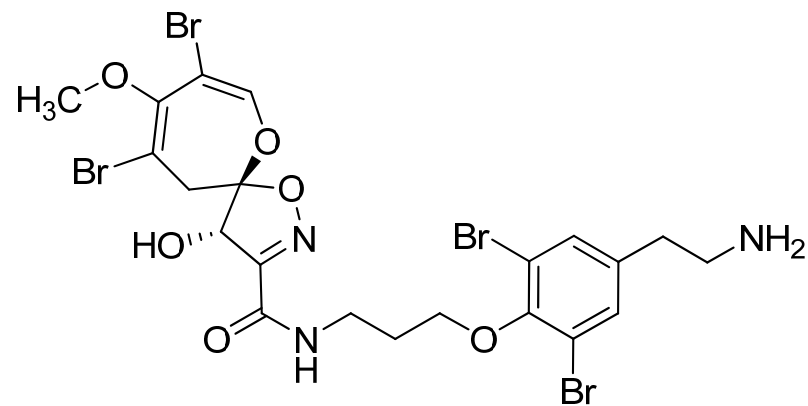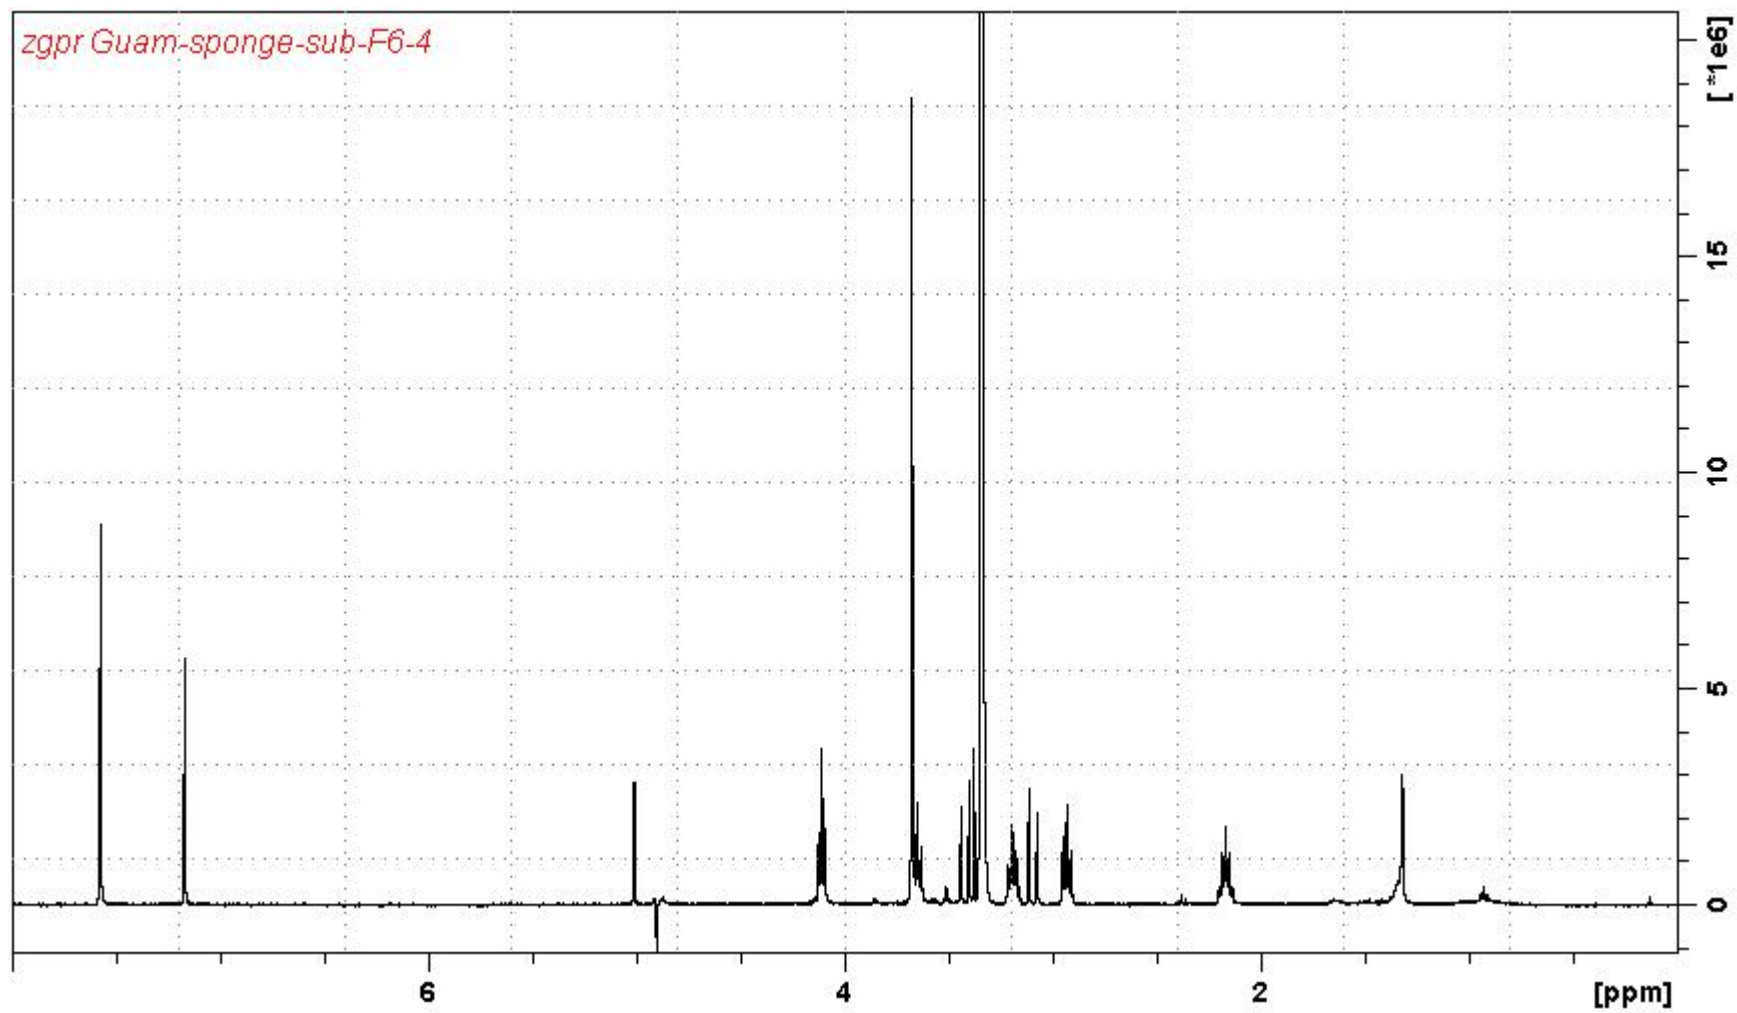

# HMBC-NMR spectrum of 7

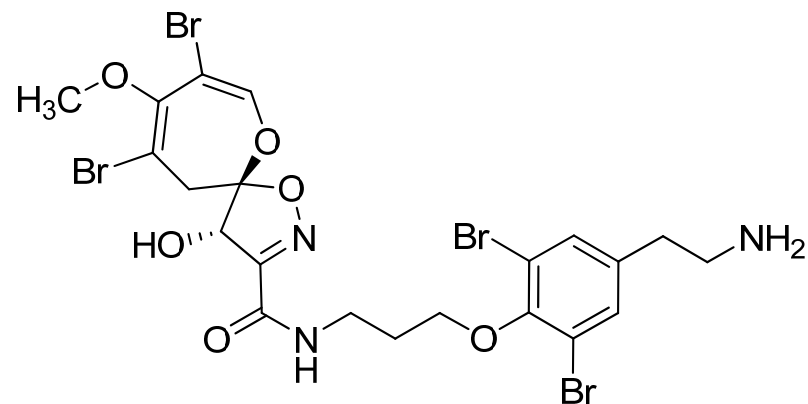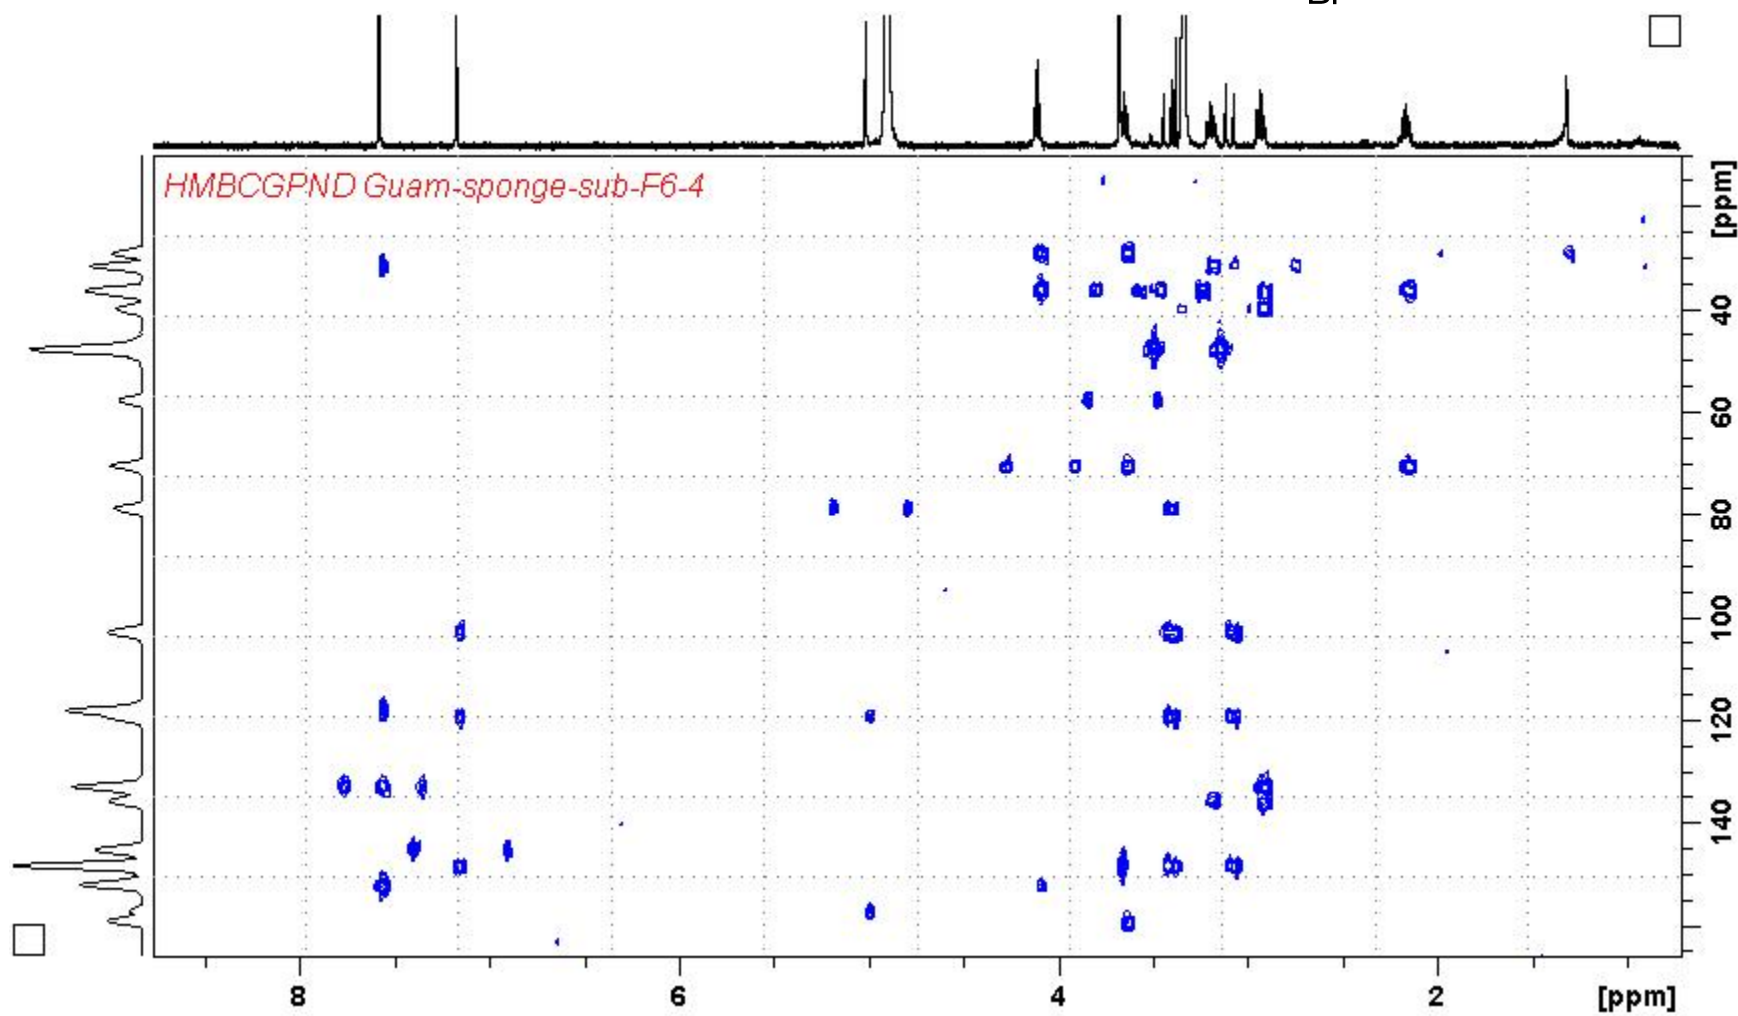



$^1\text{H}$ -NMR spectrum of **9**

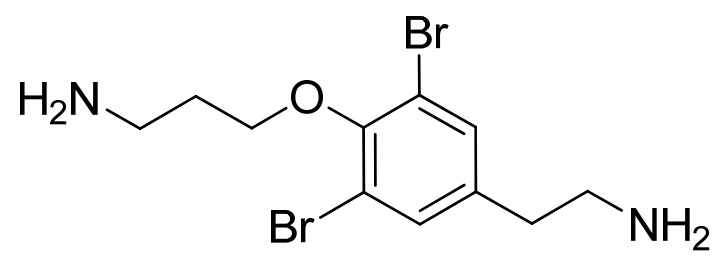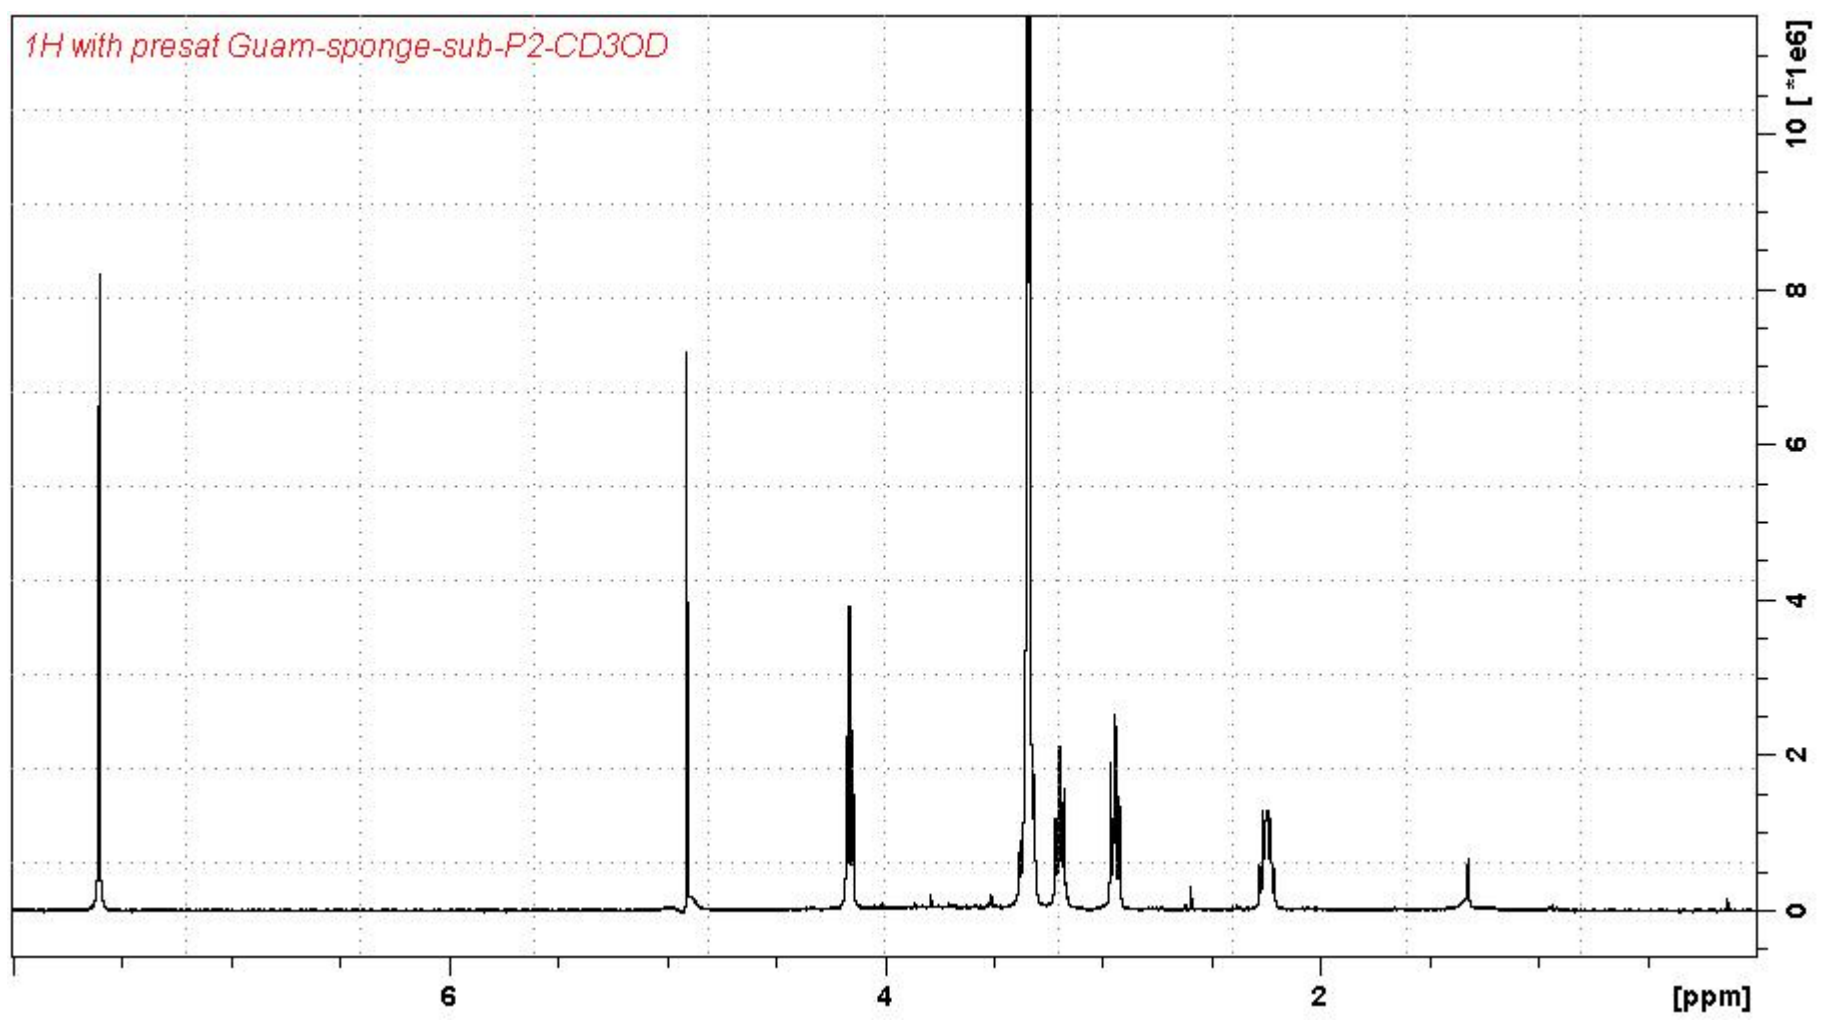

# HMBC-NMR spectrum of **9**

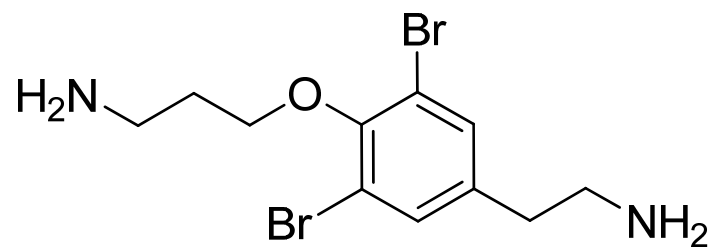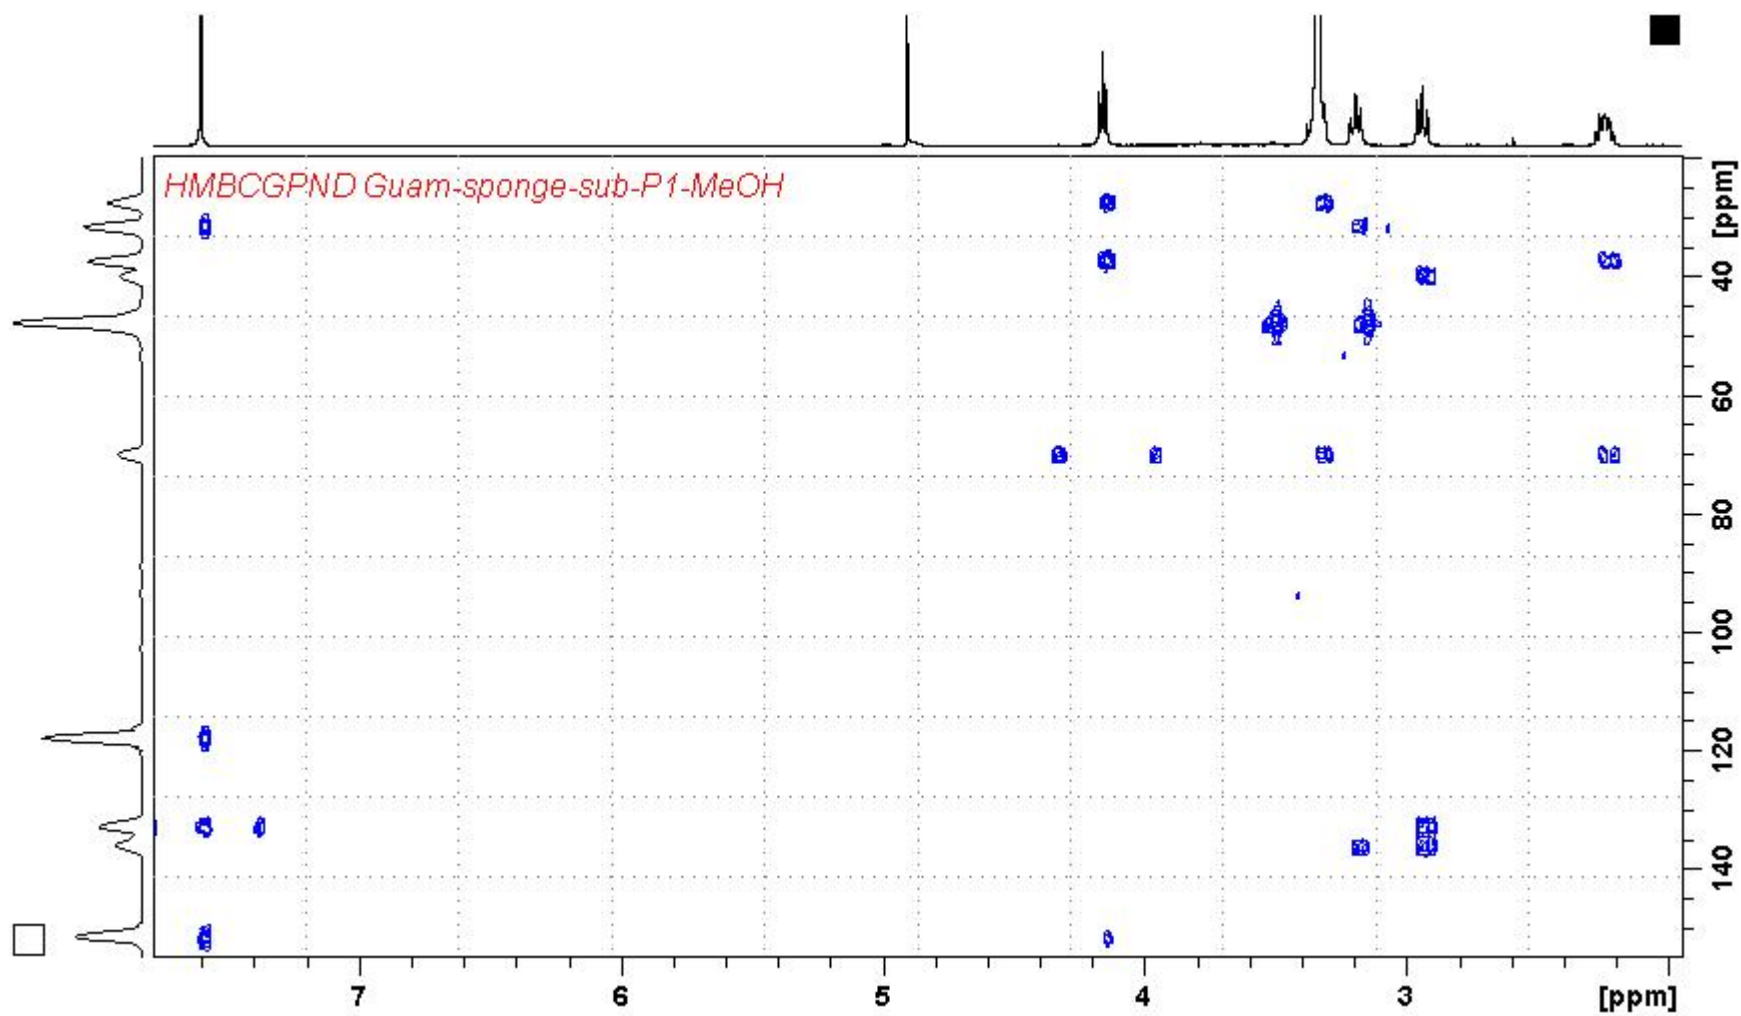

Supplement: NIHMS349775-supplement-1_si_001.pdf [file NIHMS349775-supplement-1_si_001.pdf]
